# ExTraMapper: Exon- and Transcript-level mappings for orthologous gene pairs

Ferhat Ay<sup>1,2,\*</sup>, Abhijit Chakraborty<sup>1</sup>, Ramana V. Davuluri<sup>3</sup>

<sup>1</sup> La Jolla Institute for Allergy and Immunology, La Jolla, CA, 92037, USA

<sup>2</sup> UC San Diego, School of Medicine, La Jolla, 92093, CA, USA

<sup>3</sup> Northwestern University Feinberg School of Medicine, Chicago, IL, 60611, USA

\* To whom correspondence should be addressed. Tel: +1-858-752-6612 Email: [ferhatay@lji.org](mailto:ferhatay@lji.org)

## ABSTRACT

Access to large-scale genomics and transcriptomics data from various tissues and cell lines allowed the discovery of wide-spread alternative splicing events and alternative promoter usage in mammals. However, evolutionary studies that aim at identifying orthology relationships mostly focus on gene-level orthology which hinders the importance of transcript-level diversity. Between human and mouse, gene-level orthology is currently present for nearly 16k protein coding genes spanning a diverse repertoire of over 200k total transcript isoforms. Here we describe a novel method, *ExTraMapper*, which leverages sequence conservation between exons of a pair of organisms and identifies a fine-scale orthology mapping at the exon and then transcript level. ExTraMapper identifies more than 250k exon, as well as 30k transcript mappings between human and mouse. We demonstrate that ExTraMapper identifies a larger number of exon and transcript mappings compared to previous methods. Furthermore, it identifies exon fusions, splits and losses due to splice site mutations, and finds better transcript-level mappings compared to Ensembl orthology for the human proto-oncogene *BRAF* and its ortholog *Braf* in mouse. ExTraMapper is applicable to any pair of organisms that have orthologous gene pairs and allows translation of alternative splicing events and transcript expression values from one organism to another.

## INTRODUCTION

The fundamental process of gene expression in mammalian genomes is a highly complex procedure that is regulated at multiple different levels (1). An important part of this regulation involves transcription of alternative gene products from a single gene through use of alternative promoters and alternative splicing (2-5). Alternative transcription allows an organism to produce multiple transcripts from a single gene, and in turn, these transcripts are translated into multiple protein isoforms that may substantially differ in their structures and functions (6-8). Recent advances in sequencing technology and the analysis of sequencing data now allow researchers to explore “one gene → multiple isoforms → multiple functions” paradigm instead of still commonly used “one gene → one protein → one function” approach (9-11). However, the common mode of research remains to be gene oriented partly due to informatics challenges posed by multiple and partially overlapping transcripts including the very fundamental problem of quantification of isoform level expression (12).

While many bioinformaticians are making big strides in overcoming the challenges of transcript/isoform level gene expression analysis (12-15), only a few studies so far attempt to comparatively analyze transcripts to find transcript-level orthology relationship among different organisms (16,17). One important intermediate step in revealing transcript-level relationships between a pair of organisms is to identify their conserved exons. Again, in the literature, there is only a limited number of studies that aim to find exon-level relationships among different organisms (18-22). These methods use either sequence alignment tools, such as BlastN and tBlastX, or reverse engineer the protein level similarity between isoforms to find conserved exons between two organisms. Often, only the fully coding exons are considered by these methods completely leaving out the partially coding and the non-coding exons such as first and last exons of a transcript. At the transcript level, Exalign, described in Pavesi et al.(16) and used for transcript mappings in Zambelli et al. (17), computes similarities between two given transcripts by utilizing only the exon-intron structure and the coding lengths of exons. Exalign first calculates a pairwise exon similarity score that solely depends on the length difference between the two exons and then uses these scores to find the best local alignment between the exon-intron structures of the two transcripts. As we will discuss further, Exalign does not utilize any sequence similarity or orthology information between the exons or the transcripts and is biased towards assigning higher similarity scores for transcripts with large number of exons.

Here we describe a new method, *ExTraMapper*, which extracts fine-scale mappings between the exons and transcripts of a given pair of ortholog genes between two organisms using sequence conservation between the two genomes (Figure 1). To demonstrate the use of our method, we find exon and transcript mappings for nearly 16k protein coding genes with orthology defined between human and mouse. Compared to previous methods, ExTraMapper identifies a significantly larger number of exon, as well as transcript mappings with differing stringencies for conservation. ExTraMapper also provides a more detailed exon classification in terms of exon conservation status and reason for exon loss/gain from one organism to the other. Using similarity both in coding domain and in overall sequence, ExTraMapper better distinguishes transcript pair similarities leading to resolution of many-to-many relationships between transcripts into one-to-one when possible. Furthermore, transcript similarity scores computed by ExTraMapper show less dependency to the number of exons of a transcript compared to an existing method that uses only exon length information for scoring transcript pairs. Our results on multiple important human-mouse ortholog gene pairs show that ExTraMapper finds biologically relevant transcript-level mappings and examples of exon fusions, splits and losses due to splice site mutations.

## **MATERIAL AND METHODS**

### **Publicly available datasets and methods**

Gene annotations and orthologous pairs. We download and use gene annotations and orthology information from Ensembl database release 81(23). For human genome, we use the GTF file

Homo\_sapiens.GRCh38.81.gtf.gz and the corresponding reference genome build of hg38. For mouse genome, we use the GTF file Mus\_musculus.GRCm38.81.gtf.gz and the corresponding reference genome build mm10. For the orthology information of gene pairs between human and mouse genomes, we use the files [ensembl\\_mart\\_81/hsapiens\\_gene\\_ensembl\\_\\_homolog\\_mmus\\_\\_dm.txt.gz](#) and [ensembl\\_mart\\_81/mmusculus\\_gene\\_ensembl\\_\\_homolog\\_hsap\\_\\_dm.txt.gz](#). These files provide orthology pairings for 16,711 genes, 15,846 of which are annotated as protein coding genes in both organisms. Almost all the remaining orthologous gene pairs code for various types of RNA and are between single-exon, single-transcript genes which are trivial cases for our interest. Summary of exon and transcript-level annotations for the 15,846 orthologous gene pairs are presented in [Table 1](#).

Conservation scores between human and mouse. We use Multiz alignments provided as MAF (Multiple Alignment Format) files and PhastCons to compute a conservation score for each human and mouse exon (24-26). We filter the MAF files downloaded from <http://hgdownload.cse.ucsc.edu/goldenPath/hg38/multiz7way/hg38.7way.maf.gz> for human genome and from <http://hgdownload.cse.ucsc.edu/goldenPath/mm10/multiz60way/maf/> for mouse genome by using *maf\_parse* to only keep human to mouse and mouse to human alignments. We then use *phastCons* twice, once to obtain tree models and once to generate wig files with conservation scores at single base pair resolution. Using these scores, for each exon in either organism, we compute average conservation scores (i) for the whole exon body, (ii) for the coding portion of the exon and, (iii) for the acceptor and donor sites of the exon.

Exon mappings from OrthoExon (20). We download mappings between united exons described in Fu et al from <http://tdl.ibms.sinica.edu.tw/OrthoExon/download.html>. Since the exon coordinates in these mappings belong to earlier reference genome versions (hg18 for human and mm9 for mouse), we first use *liftOver* to convert these coordinates and then use *bedtools intersect* to find corresponding exons in hg38 and mm10 genome builds. [Table 2](#) provides a summary of the resulting exon mappings.

Exon mappings from protein isoforms using Inparanoid (22). We download mappings between orthologous exons described in Zhang et al from <http://genomebiology.com/content/supplementary/gb-2009-10-11-r120-s5.zip>. Since the exon coordinates in the mappings provided in Dataset\_s2\_Human\_and\_mouse\_orthologous\_exons\_list.tsv belong to earlier reference genome versions (hg18 for human and mm8 for mouse), we first use *liftOver* to convert these coordinates and then use *bedtools intersect* to find corresponding exons in hg38 and mm10 genome builds. [Table 2](#) provides a summary of the resulting exon mappings.

Transcript mappings from Exalign (16,17). We download Exalign software from the link <http://159.149.160.51/exalign/Download/exalign.tar.gz>. We then parse the transcript information for only protein coding transcripts from Ensembl database (release 81) for human and mouse in the input format desired by Exalign. We use “*exalign -O <organism>.rf -freq*” to compute exon length frequency files required by Exalign for each organism using all their genes. Then, for each orthologous gene pair, we create a query/database file pair using only the transcripts for that gene pair. We then run *exalign*

with default parameters to find transcript mappings from human to mouse and from mouse to human using exon length frequencies generated from all genes.

### Detailed description of ExTraMapper

Computation of pairwise exon similarities. From the 15,846 orthologous gene pairs, we first extract all exons from all annotated transcripts for both human and mouse genomes. We use *liftOver* chains between the two organisms to find, for each exon coordinate in one organism, the corresponding genomic coordinates in the other organism. In order to allow for non-perfect exon mappings, we use multiple settings for the “-minMatch” parameter (0.9, 0.95 and 1.0) of *liftOver* which sets the minimum ratio of bases that must remap to the target organism (default value is 0.95). Also, to capture potential one-to-many mappings, we use the “-multiple” option of *liftOver* which allows outputting multiple target regions per input region. For each gene pair  $g, \bar{g}$ , for each exon  $e_i$  of the gene  $g$  in one organism, we find the exons of the gene  $\bar{g}$  from the other organism that intersect with the lifted over coordinates of  $e_i$ . For each possible pairings of the  $e_i$  from  $g$  and  $\bar{e}_j$  from  $\bar{g}$ , we compute a similarity score using:

- i. the amount of overlap between the lifted over  $e_i$  coordinates and the original  $\bar{e}_j$  coordinates,
- ii. the ratio between the original length and the lifted over length of  $e_i$ .

We compute the same score for the  $e_i - \bar{e}_j$  pair by reversing the order of the two organisms and take the maximum score between the two orderings. More formally, let  $lf(e)$  denote the lifted over coordinates and  $|e|$  denote the length of the exon  $e$ . Then, we define the similarity for the exon pair  $e_i, \bar{e}_j$  as:

$$sim(e_i, \bar{e}_j) = \max\left(\frac{2 * |overlap(lf(e_i), \bar{e}_j)|}{|lf(e_i)| + |\bar{e}_j|} * \frac{\min(|e_i|, |lf(e_i)|)}{\max(|e_i|, |lf(e_i)|)}, \frac{2 * |overlap(lf(e_j), \bar{e}_i)|}{|lf(e_j)| + |\bar{e}_i|} * \frac{\min(|e_j|, |lf(e_j)|)}{\max(|e_j|, |lf(e_j)|)}\right)$$

This score is zero for any two exons that do not overlap after both ways of liftOver and it is proportional to the percentage of overlap for overlapping exon pairs. The second terms on each side of the *max* operator account for cases in which the lifted over coordinates correspond to shorter or longer regions with respect to the original exon coordinates and is 1 for length preserving liftOver operations which are usually the case. A similarity score of 1 corresponds to perfect conservation of length and overlap for an exon between human and mouse genomes within an orthologous gene pair.

We calculate the above similarity over the whole exon body regardless of whether the exon is fully coding, partially coding or non-coding. To compute a coding similarity counterpart of this overall exon similarity, we analyze three cases of exon coding type separately. For the case of fully coding exons, the overall similarity equals coding similarity. For non-coding exons the coding similarity is trivially undefined and is set to zero. For the case of partially coding exons, we compute coding similarity score using only the coding portion of an exon. We use the coding portions of each partially coding exon for the liftOver between the organisms and then for the length and overlap calculations. We then use these values in the same formulation as above to compute the coding similarity score. We store

both the overall and coding similarities, and use them in overall and coding similarity calculations for transcript pairs and for exon-level mappings.

Computation of pairwise transcript similarities. For each orthologous gene pair  $g, \bar{g}$ , for each pair of transcripts  $t_i, \bar{t}_j$  such that  $t_i \in g$ , and  $\bar{t}_j \in \bar{g}$ , we compute two similarity scores (i.e., overall and coding) using the similarities of the conserved exons between the two organisms. Computation of these similarity scores is non-trivial since an exon of one organism sometimes overlaps with several other exons of the other. Accordingly, there are multiple different ways to compute the transcript level similarities. This problem bears resemblance to sequence alignment but exons are the units aligned instead of nucleotides. Therefore, one solution is to use **dynamic programming** to find the exon alignment with possible gaps using strictly similarity scores (zero or greater) and a gap penalty of zero. Another option is to use all exon pairs that have an exon similarity score of at least a given similarity threshold for the transcript-level similarity calculation. The third way to compute the transcript similarity is to **greedily** select the “most” similar exon pair between the two transcripts, match the two exons to each other, remove them from the set of exons to be paired and repeat this process until there is no exon pair with a similarity score of at least a given threshold. For this greedy approach, determining the “most” similar exon pair at each step requires tie break conditions as ties are quite common. For this purpose, we first look at the coding similarity of each exon pair and if there are multiple exon pairs with the same similarity score we then break the tie by the overall exon similarity. If there are still ties, we pick one exon pair and report it and then repeat the process. Note that this will not exclude unpicked exon pairs which will be reconsidered in the next iteration unless one element of the exon pair is already reported.

Once a set of one-to-one and non-contradicting exons mappings  $E_m$  are found for a transcript pair  $t_i, \bar{t}_j$ , we can then define the similarity score as:

$$\text{sim}(t_i, \bar{t}_j) = \frac{2 * \sum_{e \in t_i, \bar{e} \in \bar{t}_j, (e, \bar{e}) \in E_m} \text{sim}(e, \bar{e})}{|t_i| + |\bar{t}_j|}$$

Note that for partially coding exons, we take  $\text{sim}(e, \bar{e})$  as the maximum of overall exon similarity and coding exon similarity. We use all exons, including non-coding exons, for the overall pairwise transcript similarity. For the coding transcript similarity, we use only the exons that are either fully coding or partially coding for both exon similarity and transcript length calculations in the above equation. These transcript similarity scores range between 0 and 1, with a similarity score of 1 indicating perfect conservation of a transcript between human and mouse genomes including the transcript length and exon identity.

Extraction of transcript-level mappings between human and mouse. Once we compute pairwise transcript similarities for each gene pair, we get a transcript similarity matrix  $T$  that is  $n \times m$  where  $n$  and  $m$  correspond to number of transcripts of the two genes in the orthologous gene pair. Each transcript from one organism potentially has similarity to multiple transcripts from the other organism

leading to one-to-many or many-to-many relationships among the transcripts of the two organisms. We use a greedy method to extract a set of transcript mappings which mostly includes one-to-one mappings that do not conflict with each other. Note that, it is possible to extract such set of mappings with highest total similarity score by solving the maximum weight bipartite matching (MWBM) which can be done in polynomial time. However, MWBM prefers multiple suboptimal mappings (e.g., two mappings with score of 0.6 and 0.5) to a perfect mapping of score 1 which conflicts with the two suboptimal mappings. This feature, even though desirable in some scenarios, is undesirable for our purpose which is to find a set of transcript mappings, even though it may be a small set, that are highly conserved between the two organisms. Therefore, we greedily select the transcript pair with the highest similarity score first, accept this transcript mapping into our results set and then set the corresponding row and column in matrix  $T$  to zero to ensure no conflicting mappings will be selected in the later iterations. We repeat this process until no more non-zero entries are left in  $T$ . We also post-process the set resulting set of mappings and discard those transcript pairs with a similarity score below a given threshold (at least 0.8) to ensure that only highly conserved pairs are reported.

Since the above described method of extracting transcript mappings can include ties, such as two pairs with the same exact score in  $T$ , in the process, we break these ties in the best way possible to favor pairs that we believe are more similar. We list the criteria for breaking these ties and their ordering in [Figure 1](#). Briefly, we first look at the coding similarity between transcripts to pick a single transcript pair. In case of a tie for this criterion, we resort to overall transcript similarity to break the tie among the tied pairs from the previous step. If there is another tie, we pick among the tied pairs the transcript pair that has the smallest difference between the numbers of coding exons of the two transcripts. If there are still tied pairs after all the previous criteria, we try to break it by the difference between the numbers of overall exons of the two transcripts. Lastly, we pick and report all transcript pairs that are tied in all the four criteria we checked because all of these pairs have equivalent value for our purposes.

## RESULTS

### ExTraMapper utilizes exons with different coding and positional types

An important step in expanding orthology from gene level to transcript isoform level is to establish an orthology relationship between the exons which are the building blocks of transcripts. In order to define such relationship, we gather all exons from 15,846 gene pairs that are in human-mouse orthology and that have both genes annotated as protein coding (Methods). This provides us with nearly 500k and 345k exons for human and mouse, respectively. We note that Ensembl annotates the same exact coordinates with multiple different exon IDs when the same coordinates show varying coding activity across different transcripts. Collapsing such duplicate coordinates in one single entry, we get around 407k and 289k unique exon coordinates, respectively. [Figures 2a and 2d](#) plot the



distribution of number of exons per gene for human and mouse genomes, respectively. The median numbers of exons and coding exons per gene were 22 and 14 for human, and 15 and 11 for mouse.

**Table 1** reports further grouping of these unique coordinates with respect to their coding types (non-coding, fully coding or partially coding) and their positions within each transcript they are involved (first, middle, last). Note that for each classification, namely coding type and position; we report a fourth category for exons that have multiple different types in different transcripts. Our further analysis of different exon types reported in **Table 1** using evolutionary conservation scores demonstrate that coding exons are more conserved compared to non-coding exons as expected (**Supp. Fig 1**). Also, exons that are exclusively in the middle of each transcript they participate are highly conserved (**Supp. Fig 2**) and are mainly fully coding (43.7% and 60.5% for human and mouse) fully coding. In comparison, full coding exons make up only 10.7% and 8.7% among first or last exons of human and mouse genomes, respectively. These numbers are in agreement with the commonly used transcript or gene structure models with part coding or non-coding first and last exons and fully coding exons in between them. However, these numbers also suggest that a considerable fraction of the human and mouse transcripts may not follow such transcript model which is assumed by several existing methods for exon or transcript level matching (16,17).

### **ExTraMapper identifies conserved exons between human and mouse genomes**

Without any assumption on the gene or transcript structure, ExTraMapper computes exon-level similarity scores and classifies exons with respect to their conservation between human and mouse (Methods). In **Figure 2**, we summarize the fraction of exons for each gene that ExTraMapper mapped from human to mouse (a-c) and from mouse to human (d-f) with different stringencies of conservation as measured by the overlap after lifting over the coordinates. We compute this fraction for coding exons (fully or part coding) and all exons (including non-coding) separately. With an exon similarity threshold of 0.9, more than half the genes had at least 83% (human) and 96% (mouse) of all their coding exons mapped (**Figures 2b and 2e**). These percentages are 59% (human) and 75% (mouse) when all exons are considered (**Figures 2c and 2f**). Notably, a larger fraction of mouse exons are classified as mapped for each threshold choice reflecting the smaller number of total exons for mouse compared to human.

We also compute the inclusion level for an exon as the fraction of all protein coding transcripts that include a given exon (21,27), and ask whether the inclusion level is a determinant of exon conservation. Similar to Modrek et al. (21), we observe that very large percent (95.9% for human and 95.7% for mouse) of constitutive and major-form exons (i.e., inclusion level >0.5) are mapped between the two organisms by ExTraMapper. For minor-form exons (i.e., inclusion level <0.5) the percentages of mapped ones are 52.6% and 58.8% for human and mouse, respectively. These results are in conjunction with Modrek et al. which suggests that around 98% of constitutive and major-form exons and only around 28% of minor-form exons existed before the divergence of the mouse and human genomes (21). The difference in the percentages between Modrek et al. in 2003

(~40k total exons) and our work here (>840k total exons) is likely due to improvement in the exon annotations of both organisms within the past decade.

### **ExTraMapper reports additional exon mappings compared to existing methods**

We compare ExTraMapper with two previous methods that find exon-level mappings between human and mouse. For an orthologous gene pair, OrthoExon uses a two-step Blast search to find orthology exon pairs (20). OrthoExon first performs BlastN alignment from all human exons to mouse, and vice versa, to find significant hits (20). In the second step, OrthoExon realigns the exons with no significant hits from one organism to similar exons of the other using tBlastX to allow for sequence divergence. There are several issues with OrthoExon due to use of alignment-based scores for finding exon mappings. First, sequence alignment scores are more significant for longer exons leading to length bias when thresholded to determine “alignment hits”. Second, a Blast hit does not necessarily imply orthology and the hit score is not interpretable in terms of the percent overlap between the two aligned exons. Another exon mapping method by Zhang et al. uses protein level information from Inparanoid database to find ortholog and in-paralog exons between human and mouse using (22). This approach excludes first and last exons and requires exact length match between the two exons to deem that they are orthologs. These criteria substantially limits the amount of exons considered for mapping and do not allow any sequence divergence further limiting the number of relationships that can be found between human and mouse exons. Furthermore, neither of the two methods above provide any information about how the exons that do not have orthologs diverged between the two organisms.

For comparison with our exon mapping results, we download and process the exon mappings from the two methods mentioned above to have all exon IDs in Ensembl format and all exon coordinates in hg38 and mm10 reference genomes (Method). **Table 2** provides a summary of the resulting comparison of these methods with ExTraMapper run using multiple similarity thresholds for exon classification. ExTraMapper reports a significantly larger number of exons that are **conserved** for both organisms even for the most stringent threshold of 1.0, which means 100% overlap between the two exons when one is lifted over to its coordinates in the other organism. One main reason for this improvement is that ExTraMapper does not discard part coding exons or first and last exons and uses both coding similarity and overall similarity to find mappings. Indeed, ExTraMapper finds perfect mappings (threshold of 1.0) for more than three times as many part coding exons compared to two previous methods. Among the 78,037 part coding human exons, for 56,637 ExTraMapper reports perfect mappings more than 40k of which were not reported by other methods. Similar numbers hold for mouse genome with 30,002 ExTraMapper perfect mappings out of 50,933 part coding exons. Our further comparison shows that ExTraMapper captures almost all the mappings previously reported by one or both of the two published methods and reports nearly as many or more extra mappings in harmony with its name (**Supp. Fig 3**).

ExTraMapper further classifies the remaining exons which are not conserved into three subclasses. The first group, **region lost**, includes exons for which there is no corresponding region once the



coordinates are lifted over to the other organism. The exons in this group are completely deleted, partially deleted or split in the other organism. The set of exons that are completely deleted is independent of *liftOver* parameter choices (such as *minMatch*), whereas the other two categories can vary with respect to these parameter choices. The second group, **region conserved but exon lost**, consists of exons whose coordinates are successfully lifted over but to regions that are not annotated as exons in the other organism. This group can be further divided into two with respect to conservation of acceptor (AG di-nucleotide) and donor (GT di-nucleotide) sites in the lifted over coordinates. Some exons lose one or both of these splice sites rendering loss of exon function, whereas others preserve these sites but still are not annotated as exons in the other organism. The third group are the remaining non-conserved exons which were successfully lifted over to some exon regions in the other organism but with an overlap below the desired similarity threshold to be deemed conserved or mapped. We do not further analyze exons that belong to this last group because the conservation information for such exons is ambiguous. Later in the text we will provide examples of exons that belong to all other groups (conserved, region lost, region conserved but exon lost) in our case study of the *BRAF* gene. Our further analysis also shows the significant differences between evolutionary conservation score distributions of different classes of exons as determined by ExTraMapper (Supp. Fig 4). As expected, mapped exons mostly have high conservation scores and the ones in region lost group have lower scores which more uniformly span the whole range and has a median around 0.5. Interestingly, the small group of exons with the region conserved but exon function lost show a bimodal distribution where some exons have very high and others have very low evolutionary conservation scores. Further analysis shows that such exons with low conservation scores correspond to those with changes in their acceptor or donor sites between the two organisms.

### **ExTraMapper computes transcript-level similarities using exon-level conservation**

Now that we compute exon similarity scores and classify human and mouse exons according to their conservation between the two organisms, the next step is to compute similarity scores and establish mappings at the transcript level. Ensembl annotations for the 15,846 gene pairs we analyze here provide nearly 126k and 69k transcripts out of which more than 68k and 40k are protein coding for human and mouse, respectively. Figures 3a and 3d plot the distribution of number of transcripts per gene with median numbers of 6 and 3 overall, and 3 and 2 coding transcripts for human and mouse genomes, respectively. Notably, mouse has significantly less transcripts in comparison with human which is in agreement with smaller number of exons per gene for mouse. Whether these numbers reflect differences in biological diversity of transcripts or differences between the annotation qualities of the two organisms, given the current available annotations in hand, it is clear that the number of mouse transcripts will be the bottleneck for the number of transcript mappings that will be identified by ExTraMapper or any other algorithm.

We compute transcript-level similarity scores using a greedy method to find non-overlapping and non-contradicting set of exon pairings for a transcript with that maximizes the sum of exon similarity scores, either overall or only coding (Methods). Our motivation behind using a greedy approach instead of a sequence alignment-like dynamic programming approach is that we want to favor exact or near exact

mappings of exons over multiple mappings of lesser quality. For instance, given the choice between two exon mappings one with a score of 0.6 and one with a score of 0.7 and a single perfect mapping with a similarity score of 1, we prefer the latter which obviously is a conserved exon between the two organisms. A greedy approach will pick this conserved pair whereas a dynamic programming approach will do vice versa. Using this greedy approach, we compute an overall similarity score and a coding similarity score for a total of 730,440 pairs of transcripts generated from the 15,846 orthologous gene pairs. There are only 13,698 transcript pairs (1.9% of all possible pairs) giving a similarity score of 1 either from the whole transcript bodies or by their protein coding portions. These pairs have the same number of exons and have each of their exons conserved 100% (exon similarity threshold of 1). Such perfect transcript pairs span 9,710 and 8,817 different human and mouse transcripts out of which 2,542 (26.2%) and 2,653 (30.1%) appeared in more than one perfect pair suggesting one-to-many mappings exist even within perfectly conserved sets of transcripts of the two organisms. This is partly due to multiple transcripts in Ensembl with the same exact set of coordinates and partly because a perfect conservation in coding similarity still allows for difference in non-coding regions such as untranslated regions (UTRs).

### **ExTraMapper identifies mainly one-to-one transcript mappings between human and mouse**

In order to reduce the number of one-to-many transcript mappings, we employ a set of tie breakers as outlined in **Figure 1d** and described in detail in Methods. Briefly, for a given gene pair with transcript similarities computed between all possible human-mouse pairs, we first identify the transcript pairs with the maximum coding similarity. If there is only one such pair, we report this pair as a mapping and remove each transcript from their corresponding transcript sets and repeat the search for the pair(s) with maximum coding similarity. In case of a tie, we then look at, in particular order, the overall similarity, the difference in the number of coding exons and the difference in the number of all exons among all pairs with maximum coding similarity. If none of these tie breakers work then we report all such pairs allowing some number of one-to-many mappings that are equivalently good. Similar to computation of transcript similarity scores, we choose to use a greedy approach because we want to favor a smaller number of highly conserved transcript pairs instead of a larger number of moderately conserved ones. After this greedy approach with tie breaks, we get 8,006 perfect transcript pairs (either coding or overall transcript similarity score of 1) that span 7,942 and 7,945 human and mouse transcripts, respectively. This suggests that our approach eliminates a large portion of one-to-many mappings when there is enough information to distinguishing between multiple pairs with equal coding similarity.

Using the transcript similarities computed by the greedy exon mapping outlined earlier and then the tie break procedure described above, ExTraMapper reports 30,238 transcript mappings with a similarity score above 0.8 between 30,040 human and 30,001 mouse transcripts. **Figure 3** summarizes the fraction of transcripts for each gene that are mapped from human to mouse (a-c) and from mouse to human (d-f) with different stringencies of conservation as measured by the transcript

similarity score. We compute these fractions first for all transcripts and then separately for only protein coding transcripts. For thresholds other than 1.0, a substantial amount of mouse genes (58% for 0.8, 51% for 0.9 and 46% for 0.95) have all their coding transcripts mapped to human transcripts. This amount drops to 16% when only perfect mappings with a threshold of 1.0 are considered. On the human side, all these percentages are much lower as expected due to higher number transcripts per gene some of which will be left out due to lack of enough many transcripts from the mouse side. We report in [Table 3](#) and discuss below further the transcript mappings found for three important genes (*TP53*, *TP63* and *TP73*) which are known to play multiple critical roles in cell differentiation and response to stress through their rich repertoires of isoforms (8). We also create genomic tracks that visualize transcript mappings in UCSC genome browser for both human and mouse genomes. We provide an example of the UCSC visualizations for the *FOXP3-Foxp3* gene pair together with exon mappings for one transcript pair manually drawn in detail ([Supp. Fig 5](#)).

### **ExTraMapper eliminates biases in transcript similarity score computation**

We compare the transcript similarity scores computed by ExTraMapper with a previous method, namely Exalign, which uses fully coding exon lengths to compute transcript similarities (16,17). For each possible length difference  $d$  between two exons, one from human and one from mouse, Exalign calculates the probability of finding two exons with length difference at most  $d$  and uses the minus log of this probability as their exon similarity score. These similarities are then used together with a gap penalty to perform a structural alignment between a pair of transcript each of which is represented as a sequence of exon lengths. Each alignment reports (i) a Blast-like alignment score that is independent of the query or database size, and (ii) an expectation value (E-value) that corresponds to the number of equally good or better hits expected by chance when searching the query transcript against a database of a particular size. For our comparison with ExTraMapper, we use Exalign's alignment scores which are perfectly correlated the minus log of E-values.

We download and apply Exalign to the same set of gene annotations used for ExTraMapper for a fair comparison (Methods). First, we compare the best Exalign alignment score and the best ExTraMapper similarity score for each protein coding transcript in human and mouse genomes. [Figure 4a](#) shows that there is very strong correlation between the best Exalign score and the number of exons a human transcript has (Pearson's  $r=0.89$ ). On the other hand, ExTraMapper scores have substantially lower dependence on the transcript length ([Figure 4b](#), Pearson's  $r=0.397$ ). Both figures are in agreement that human transcripts which code longer proteins (over 50 coding exons) have very similar ortholog transcripts in mouse suggesting they are evolutionarily conserved. However, nearly linear relationship between the transcript length and Exalign scores across the whole range of lengths suggest that the Blast-like score used by Exalign is highly biased by the transcript length. Similar plots for mouse transcripts show much smaller correlation between the length and the best score for both methods but a visual dependency between the scores and the length for Exalign ([Figure 4c,d](#)).

Another advantage of ExTraMapper over ExAlign is the use of both coding and non-coding transcript similarity and the outlined tie break criteria to find one-to-one transcript mappings when possible.

**Table 3** lists the transcript-level mappings between human and mouse for three important genes, namely *TP53*, *TP63* and *TP73*. For instance, human *TP53* gene and its mouse ortholog *Trp53* have 24 and 4 protein coding transcripts, respectively. All four mouse transcripts differ from each other in terms of their protein length and, hence, in terms of either their coding start or end coordinates. When ExAlign is run in order to compute scores for transcript pairs between *TP53* and *Trp53*, it returns ties for (i.e., the same exact score) for 16 pairs that are all combinations of four coding transcripts from human and all the four coding transcripts of mouse. This makes it impossible to extract transcript mappings beyond this four by four relationship. Instead, when we run ExTraMapper, it first reduces the coding transcript similarity scores that tie to a two by two by using information from part coding exons and then is able to break these ties further using overall similarity to report four different one-to-one mappings as reported in **Table 3**. Such differences between the two methods in distinguishing transcript pairs from each other is observed for other genes where multiple different transcripts have the same number of exons such as 11 exons for the case of *TP53* described above. *TP63-Trp63* isoforms vary in length and show very strict conservation between human and mouse leading both methods to successfully capture transcript mappings.

#### **A case study: Finding transcript-level mappings of the *BRAF-Braf* gene pair**

Human *BRAF* gene is a proto-oncogene on chromosome 7 that encodes a RAF kinase (BRAF), which participates in the MAP kinase/ERK signalling pathway. Mutations in *BRAF* gene are shown to play important roles in multiple cancers including melanoma, lung and colon cancers as well as in developmental disorders (28-30). *BRAF* is shown to be conserved among multiple organisms including fruit fly, worm and mouse. *Braf*, located on chromosome 6, is the mouse ortholog of human *BRAF* gene. According to Ensembl annotations (release 81), *BRAF* and *Braf* have 33 and 42 exons, respectively. The human ortholog spans 205 kb whereas the mouse one is around 122 kb long. Both genes have 5 transcript isoforms and 2 of them in each case are protein coding.

In Ensembl database, the orthology between *BRAF* and *Braf* genes is reported as a one-to-one relationship between two protein isoforms ENSP00000288602 and ENSMUSP00000002487 are encoded by the transcripts ENST00000288602 (*BRAF*-001) and ENSMUST00000002487 (*Braf*-001), respectively. **Figure 5(a)** illustrates the best mapping of the exons of these two transcripts using pairwise coding exon similarities. *Braf*-001 has 4 more exons and codes for 38 more amino acids (aa) compared to *BRAF*-001 (22 vs 18 and 804 vs 766). Third exon of *BRAF*-001 with length 263 corresponds to a fusion of two exons in *Braf*-001 (lengths of 69 and 94) and the retention of the 100bp intron between them. *Braf*-001's exon of length 35 is lost in human because of mutations in the donor and acceptor splice sites. Another *Braf*-001 exon with length 119 is also lost in human even though the splice sites are conserved. Also, *BRAF*-001 terminates one exon early compared to *Braf*-001. Overall, there are considerable differences between these two transcripts and their corresponding protein isoforms even though Ensembl orthology is defined through them. To the best of our knowledge, Ensembl gene-level orthology relationships are defined through pairing the longest protein isoforms of each organism even though they may not be the most similar ones.

**Figure 5(b)** illustrates the best transcript-level mapping identified with ExTraMapper which links protein isoforms ENSP00000288602 and ENSMUSP00000099036 that are encoded by the transcripts ENST00000288602 (BRAF-001) and ENSMUST00000101497 (Braf-002), respectively. These two transcripts have the same number of exons and an almost perfect mapping between their exons except the first ones. ExTraMapper coding transcript similarity score for this pair is 0.97 out of 1 whereas it was 0.86 for the transcript pair reported by Ensembl gene orthology illustrating the need for systematic pairing at the transcript level. **Figure 5(c)** demonstrates other suboptimal alignments found between the longest mouse transcript Braf-001 (protein coding) and three human transcripts BRAF-002 (nonsense mediated decay), BRAF-003 (protein coding) and BRAF-004 (retained intron). Notably, BRAF-002 contains a premature stop codon that limits the coding part to its first five exons, BRAF-003 is a near perfect match to the last 10 exons of Braf-001 initiated by an alternative first exon of length 136, and BRAF-004 contains a large exon of length 811 which retained multiple intronic regions surrounding two exons in mouse. Overall, this case study provides us examples of complex exonic and splicing events that lead to different transcript with varying biotypes in human and mouse. Furthermore, it demonstrates the use of ExTraMapper in identifying such events as well as maximum similarity transcript pairings that are not readily available in any public dataset to the best of our knowledge.

## DISCUSSION

Gene regulation is one of the most fundamental processes that confers cellular identity and modulates the biological activities within a cell. However, most of the current analyses on gene regulation are carried out under the 'one gene -> one protein -> one function' paradigm thereby ignore the use of alternative promoters and alternative splicing in mammalian genes. Evolutionary studies that aim at identifying orthology relationships between organisms is not an exception to this trend and are also mostly focused on gene-level orthology. For example, HomoloGene (<http://www.ncbi.nlm.nih.gov/homologene>) is a system for automated detection of homologs among several completely sequenced eukaryotic genomes at the gene level. However, the 16k gene pairs that are orthologs between human and mouse span a diverse repertoire of over 200k total transcript isoforms more than 125k of which are protein coding. Current tools including HomoloGene do not provide any information on which of these transcripts from mouse correspond to those in human in terms of their DNA sequence, protein sequence and function.

Here we described a novel method, ExTraMapper, which leverages sequence conservation between exons of a pair of organisms and identifies a fine-scale orthology mapping at the exon and then transcript level. ExTraMapper identified more than 250k exon, as well as 30k transcript mappings between human and mouse genomes. On a number of case studies, we demonstrated that ExTraMapper identifies exon fusions, splits and losses due to splice site mutations, and finds better transcript-level mappings compared to Ensembl orthology. Our results comparing human and mouse genomes showed that ExTraMapper finds mappings for more than 95% of exons that are involved in at least half of the annotated transcripts in either genome in agreement with previous studies that use a 20 times smaller subset of exons than used here. Compared to two existing exon mapping methods,

ExTraMapper identified two to three times more perfect exon mappings (100% conservation) between human and mouse. By using both coding and overall conservation of an exon, we identified more than 30k mappings between part coding exons which were missed by the existing methods.

At the transcript level, ExTraMapper identified mainly one-to-one mappings using a greedy approach with multiple tie breakers. We reported 30,238 transcript mappings with a similarity score above 0.8 between 30,040 human and 30,001 mouse transcripts out of which 8,006 were perfect transcript mappings (100% conservation). We presented these transcript mappings for genes with known isoform-specific functions (TP53, TP63 and TP73) and created genome browser tracks for visualizing such mappings from either one of the compared genomes. We also showed that a previous method that exclusively uses exon lengths in a Blast-like transcript alignment has a strong bias in mapping transcripts with larger number of exons and that ExTraMapper alleviates this bias resulting in mappings for transcripts from all length scales. Further research directions include better visualization and annotation of transcript mappings found by ExTraMapper as well as its extension to include multiple mammalian genomes simultaneously.

We believe that ExTraMapper will have a great impact for translational sciences as it provides a dictionary for translating transcript-level information about gene expression and gene regulation from one organism to another. For example, one direction this translation can be done is from mouse models to human genome. This will be specifically useful for work with certain tissues or samples that are difficult to obtain from human donors or come in very limited quantities. Another important aspect of our work is that it allows us to identify which genes have highly conserved exon-intron structures and transcript repertoires between two organisms such as human and mouse. This information is important for understanding the extent of evolutionary differences with respect to specific gene functions and biological pathways. For instance, our GO term enrichment analyses showed that human genes that have all their protein coding transcripts map perfectly to a corresponding mouse transcript are enriched in certain developmental processes such pattern specification process and regionalization. On the other hand, genes that have none of their coding transcripts map to any mouse transcript are enriched in response related processes such as defense response to other organism suggesting higher level of divergence between human and mouse in their immune system related transcripts.

## **ACKNOWLEDGEMENT**

We would like to thank Wen-chang Lin for making their OrthoExon database available for batch download.

## **FUNDING**

The work was supported in part by the National Library of Medicine of the National Institutes of Health (NIH) under Award Number R01LM011297.



## REFERENCES

1. Lelli, K.M., Slattery, M. and Mann, R.S. (2012) Disentangling the many layers of eukaryotic transcriptional regulation. *Annual review of genetics*, **46**, 43-68.
2. Davuluri, R.V., Suzuki, Y., Sugano, S., Plass, C. and Huang, T.H. (2008) The functional consequences of alternative promoter use in mammalian genomes. *Trends in genetics : TIG*, **24**, 167-177.
3. Matlin, A.J., Clark, F. and Smith, C.W. (2005) Understanding alternative splicing: towards a cellular code. *Nature reviews. Molecular cell biology*, **6**, 386-398.
4. Ayoubi, T.A. and Van De Ven, W.J. (1996) Regulation of gene expression by alternative promoters. *FASEB journal : official publication of the Federation of American Societies for Experimental Biology*, **10**, 453-460.
5. Schibler, U. and Sierra, F. (1987) Alternative promoters in developmental gene expression. *Annual review of genetics*, **21**, 237-257.
6. Lerch, J.K., Kuo, F., Motti, D., Morris, R., Bixby, J.L. and Lemmon, V.P. (2012) Isoform diversity and regulation in peripheral and central neurons revealed through RNA-Seq. *PLoS one*, **7**, e30417.
7. Seiffers, R., Mills, C.D. and Woolf, C.J. (2007) ATF3 increases the intrinsic growth state of DRG neurons to enhance peripheral nerve regeneration. *The Journal of neuroscience : the official journal of the Society for Neuroscience*, **27**, 7911-7920.
8. Murray-Zmijewski, F., Lane, D.P. and Bourdon, J.C. (2006) p53/p63/p73 isoforms: an orchestra of isoforms to harmonise cell differentiation and response to stress. *Cell death and differentiation*, **13**, 962-972.
9. Pal, S., Gupta, R. and Davuluri, R.V. (2014) Genome-wide mapping of RNA Pol-II promoter usage in mouse tissues by ChIP-seq. *Methods in molecular biology*, **1176**, 1-9.
10. Wang, Z., Gerstein, M. and Snyder, M. (2009) RNA-Seq: a revolutionary tool for transcriptomics. *Nature reviews. Genetics*, **10**, 57-63.
11. Shiraki, T., Kondo, S., Katayama, S., Waki, K., Kasukawa, T., Kawaji, H., Kodzius, R., Watahiki, A., Nakamura, M., Arakawa, T. *et al.* (2003) Cap analysis gene expression for high-throughput analysis of transcriptional starting point and identification of promoter usage. *Proceedings of the National Academy of Sciences of the United States of America*, **100**, 15776-15781.
12. Kim, H., Bi, Y., Pal, S., Gupta, R. and Davuluri, R.V. (2011) IsoformEx: isoform level gene expression estimation using weighted non-negative least squares from mRNA-Seq data. *BMC bioinformatics*, **12**, 305.
13. Anders, S. and Huber, W. (2010) Differential expression analysis for sequence count data. *Genome biology*, **11**, R106.
14. Robinson, M.D., McCarthy, D.J. and Smyth, G.K. (2010) edgeR: a Bioconductor package for differential expression analysis of digital gene expression data. *Bioinformatics*, **26**, 139-140.
15. Trapnell, C., Pachter, L. and Salzberg, S.L. (2009) TopHat: discovering splice junctions with RNA-Seq. *Bioinformatics*, **25**, 1105-1111.
16. Pavesi, G., Zambelli, F., Caggese, C. and Pesole, G. (2008) Exalign: a new method for comparative analysis of exon-intron gene structures. *Nucleic acids research*, **36**, e47.
17. Zambelli, F., Pavesi, G., Gissi, C., Horner, D.S. and Pesole, G. (2010) Assessment of orthologous splicing isoforms in human and mouse orthologous genes. *BMC genomics*, **11**, 534.
18. Blekhman, R. (2012) A database of orthologous exons in primates for comparative analysis of RNA-seq data. *Nature Precedings*.
19. Douzery, E.J., Scornavacca, C., Romiguier, J., Belkhir, K., Galtier, N., Delsuc, F. and Ranwez, V. (2014) OrthoMaM v8: a database of orthologous exons and coding sequences for comparative genomics in mammals. *Molecular biology and evolution*, **31**, 1923-1928.

20. Fu, G.C. and Lin, W.C. (2012) Identification of gene-oriented exon orthology between human and mouse. *BMC genomics*, **13 Suppl 1**, S10.
21. Modrek, B. and Lee, C.J. (2003) Alternative splicing in the human, mouse and rat genomes is associated with an increased frequency of exon creation and/or loss. *Nature genetics*, **34**, 177-180.
22. Zhang, Z., Zhou, L., Wang, P., Liu, Y., Chen, X., Hu, L. and Kong, X. (2009) Divergence of exonic splicing elements after gene duplication and the impact on gene structures. *Genome biology*, **10**, R120.
23. Flicek, P., Amode, M.R., Barrell, D., Beal, K., Billis, K., Brent, S., Carvalho-Silva, D., Clapham, P., Coates, G., Fitzgerald, S. *et al.* (2014) Ensembl 2014. *Nucleic acids research*, **42**, D749-755.
24. Blanchette, M., Kent, W.J., Riemer, C., Elnitski, L., Smit, A.F., Roskin, K.M., Baertsch, R., Rosenbloom, K., Clawson, H., Green, E.D. *et al.* (2004) Aligning multiple genomic sequences with the threaded blockset aligner. *Genome research*, **14**, 708-715.
25. Siepel, A., Bejerano, G., Pedersen, J.S., Hinrichs, A.S., Hou, M., Rosenbloom, K., Clawson, H., Spieth, J., Hillier, L.W., Richards, S. *et al.* (2005) Evolutionarily conserved elements in vertebrate, insect, worm, and yeast genomes. *Genome research*, **15**, 1034-1050.
26. Siepel, A. and Haussler, D. (2004) Combining phylogenetic and hidden Markov models in biosequence analysis. *Journal of computational biology : a journal of computational molecular cell biology*, **11**, 413-428.
27. Alekseyenko, A.V., Kim, N. and Lee, C.J. (2007) Global analysis of exon creation versus loss and the role of alternative splicing in 17 vertebrate genomes. *Rna*, **13**, 661-670.
28. Hussain, M.R., Baig, M., Mohamoud, H.S., Ulhaq, Z., Hoessli, D.C., Khogeer, G.S., Al-Sayed, R.R. and Al-Aama, J.Y. (2015) BRAF gene: From human cancers to developmental syndromes. *Saudi journal of biological sciences*, **22**, 359-373.
29. Tidymen, W.E. and Rauen, K.A. (2009) The RASopathies: developmental syndromes of Ras/MAPK pathway dysregulation. *Current opinion in genetics & development*, **19**, 230-236.
30. Davies, H., Bignell, G.R., Cox, C., Stephens, P., Edkins, S., Clegg, S., Teague, J., Woffendin, H., Garnett, M.J., Bottomley, W. *et al.* (2002) Mutations of the BRAF gene in human cancer. *Nature*, **417**, 949-954.

## FIGURE LEGENDS

**Figure 1.** Overview of ExTraMapper. **(a)** Computation of exon-level similarities using gene annotations from the two organisms and the liftover chains that help map regions from one organism to the other. **(b)** Classification of exons from both organisms using the computed similarity scores and splice site information from acceptor and donor sites. **(c)** Computation of transcript-level similarities using exon-level similarity scores with a greedy exon pairing algorithm. **(d)** Extraction of transcript-level mappings between the organisms using a greedy method that applies multiple tie break conditions to ensure mostly one-to-one mappings.

**Figure 2.** Summary of exon-level mapping results for human (top row) and mouse (bottom row). **(a,d)** The histograms of the number of all and coding exons per gene. **(b,e)** The histograms of the fraction of coding exons (fully coding or part coding) that are mapped when different stringency cutoffs for mapping similarity are used. A fraction of 1 indicates all exons of a gene are mapped and 0 indicates none are mapped. **(c,f)** Similar histograms using all exons (fully coding, part coding, non-coding). Dashed vertical lines correspond to median of the distribution for each plot.

**Figure 3.** Summary of transcript-level mapping results for human (top row) and mouse (bottom row). **(a,d)** The histograms of the number of all and protein coding transcripts per gene. **(b,e)** The histograms of the fraction of protein coding transcripts with unique coding coordinates that are mapped when different stringency cutoffs are for transcript similarity are used. **(c,f)** Similar histograms using all transcript types. Dashed vertical lines correspond to median of the distribution for each plot.

**Figure 4.** The length bias of the transcript-level similarity scores computed by Exalign. The density plots of the best similarity scores for each protein coding transcript are plotted for **(a)** human transcripts using Exalign **(b)** human transcripts using ExTraMapper **(c)** mouse transcripts using Exalign **(d)** mouse transcripts using ExTraMapper. Transcript length indicates the number of coding (either fully or partly) exons of a transcript. Pearson's correlation is reported for each figure together with a linear fit.

**Figure 5.** Transcript-level mappings for the *BRAF-Braf* gene pair. **(a)** Visualization of the transcript mapping between BRAF-001 and Braf-001 which is reported as the basis for orthology between the two genes by Ensembl. The coding similarity for this transcript pair is 0.86. **(b)** Visualization of the highest scoring transcript pair reported by ExTraMapper. The coding similarity for this transcript pair is 0.97. **(c)** Visualization of partial mappings from multiple human transcripts to the longest mouse transcript of Braf-001 with 22 coding exons including the part coding first and last exons. Among these potential human transcripts that can be mapped to Braf-001, ExTraMapper assigns a coding similarity score of 0.19 and an overall similarity score of 0.82 to BRAF-002. For BRAF-003 which has a nearly perfect mapping to a part of Braf-001 both the coding and overall similarities are 0.62.

## SUPPLEMENTARY DATA FILES

**Supplementary Data File 1 contains Tables 1-3 (xlsx).**

**Table 1.** Summary of exon and transcript annotations from Ensembl (release 81) for human and mouse genomes.

**Table 2.** Summary of the number of exon-level mappings identified by different methods.

**Table 3.** Transcript-level mappings reported by ExTraMapper for three human mouse gene pairs *TP53-Trp53*, *TP63-Trp63* and *TP73-Trp73*.

**Supplementary Data File 2 contains Supplementary Figures 1-5 (pdf).**

## (a) Exon-level similarity

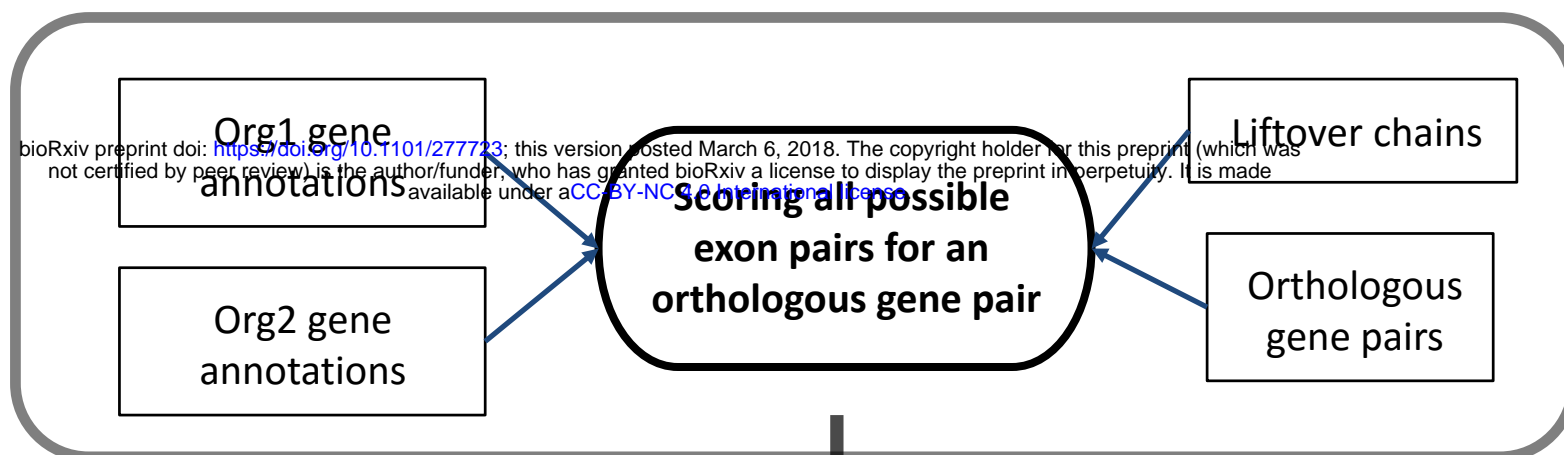

## (b) Exon classification

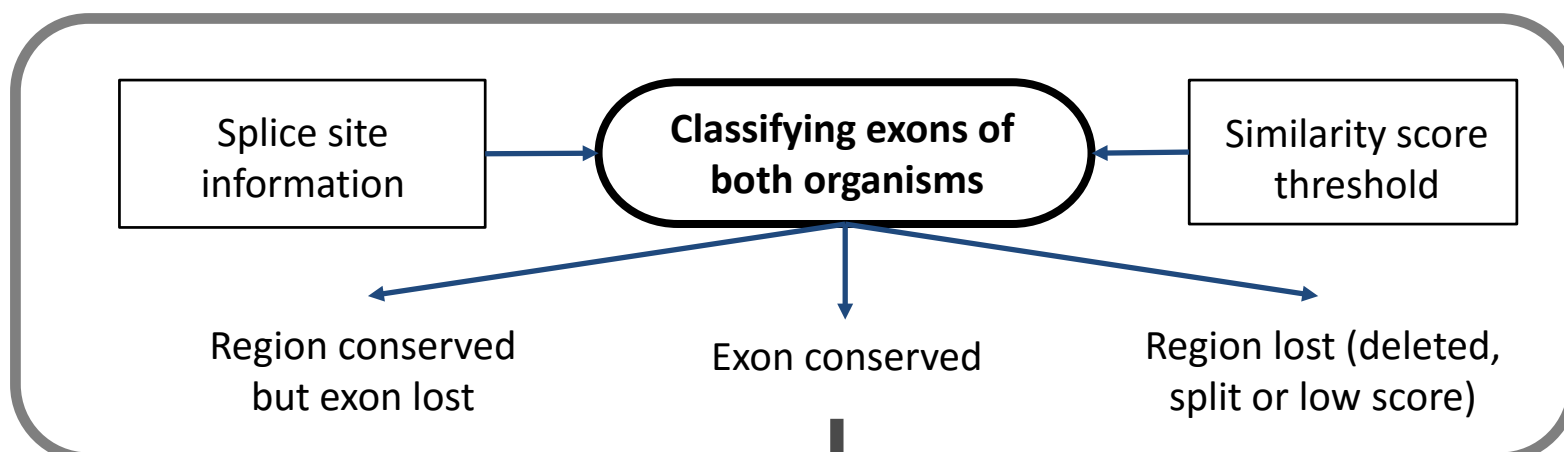

## (c) Transcript-level similarity

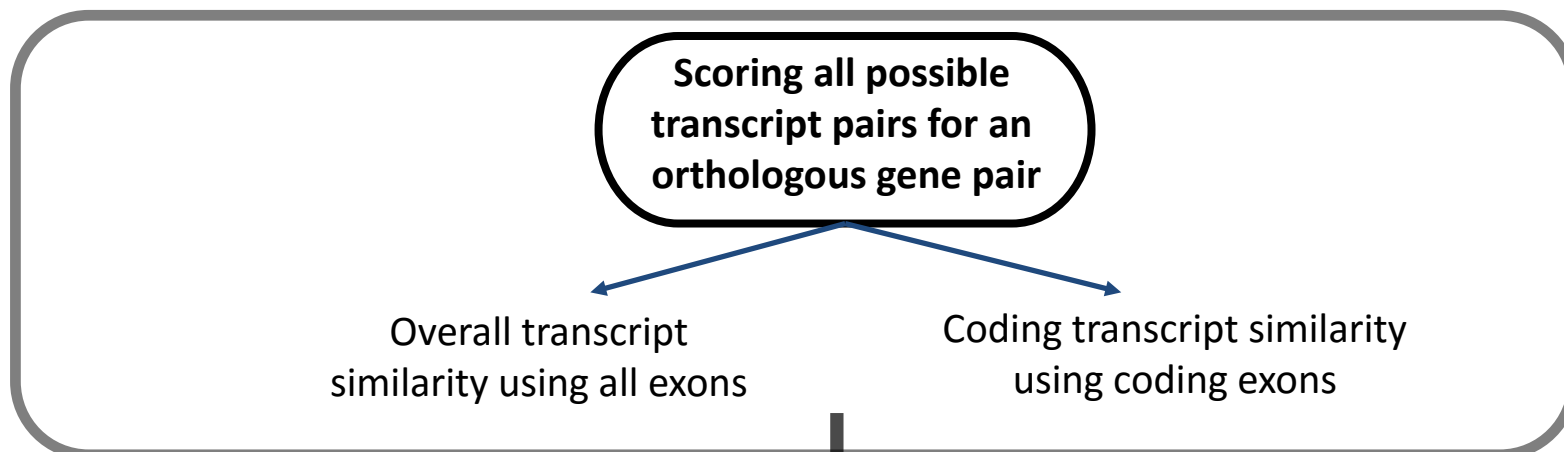

## (d) Transcript mappings

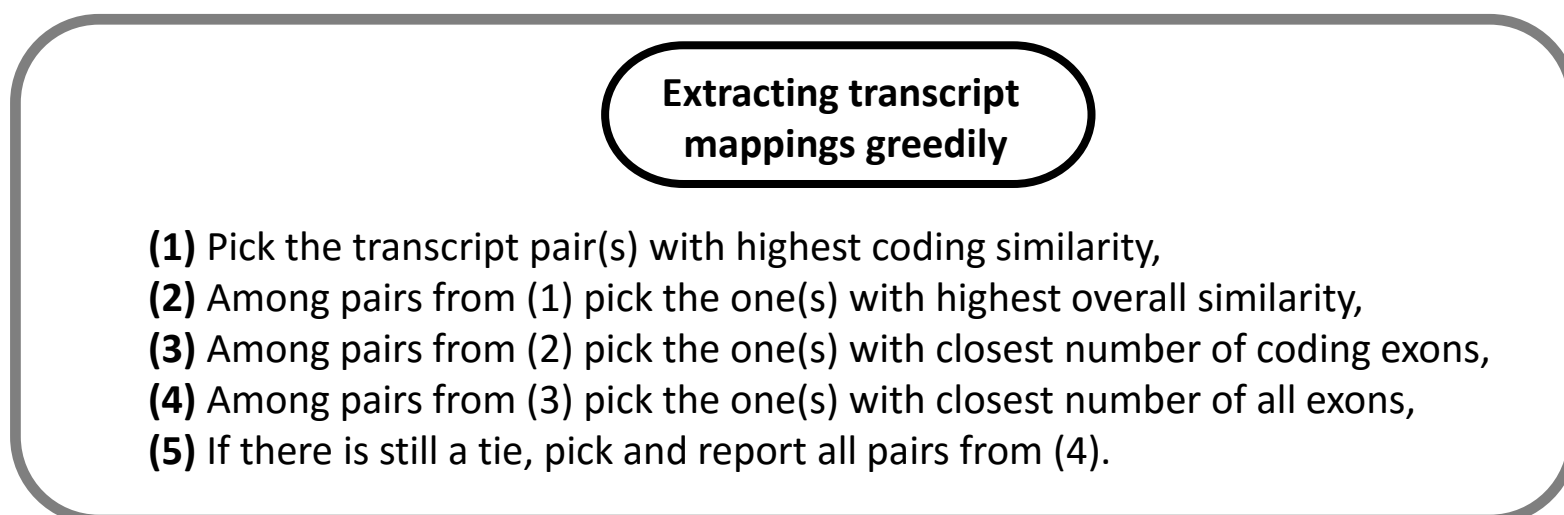

**(a)**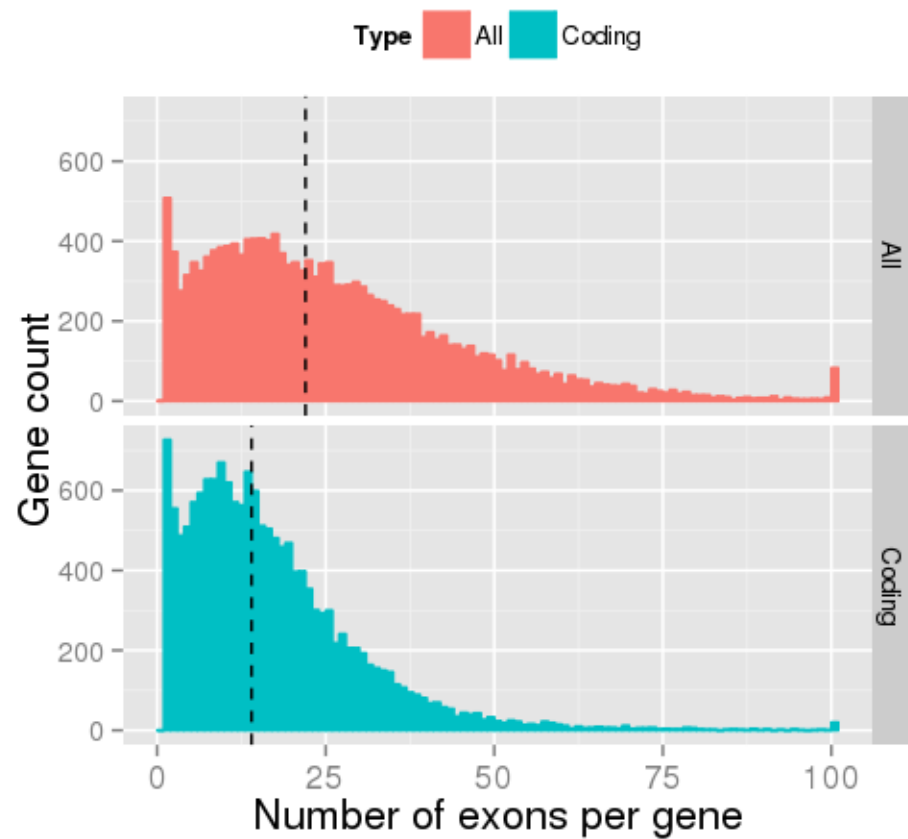**(b)**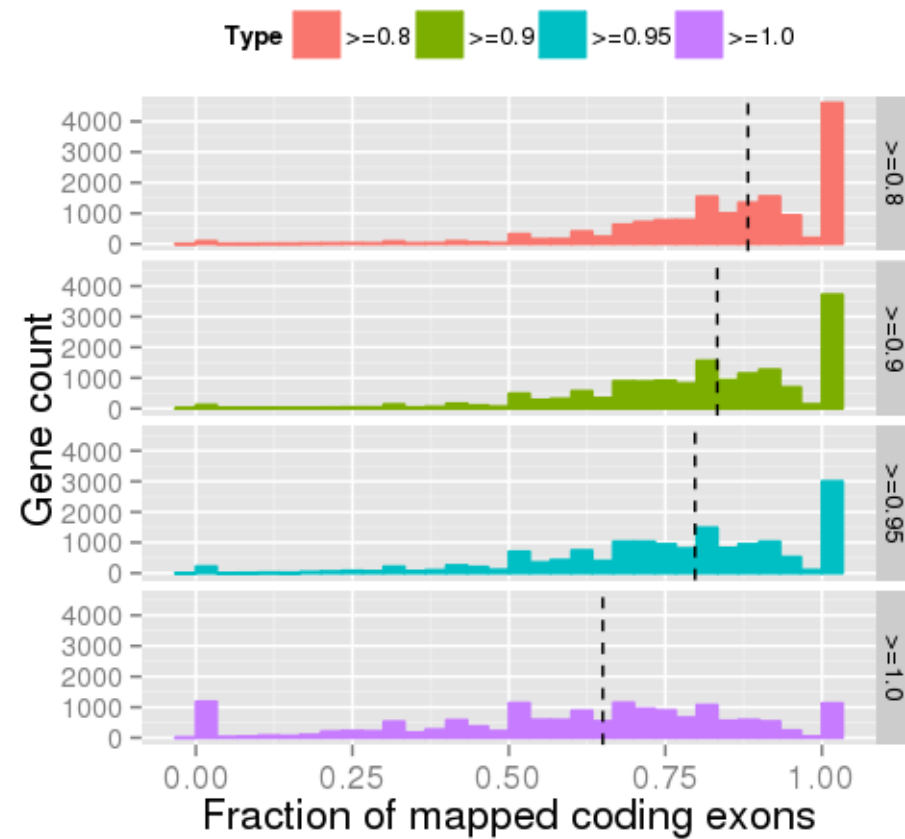**(c)**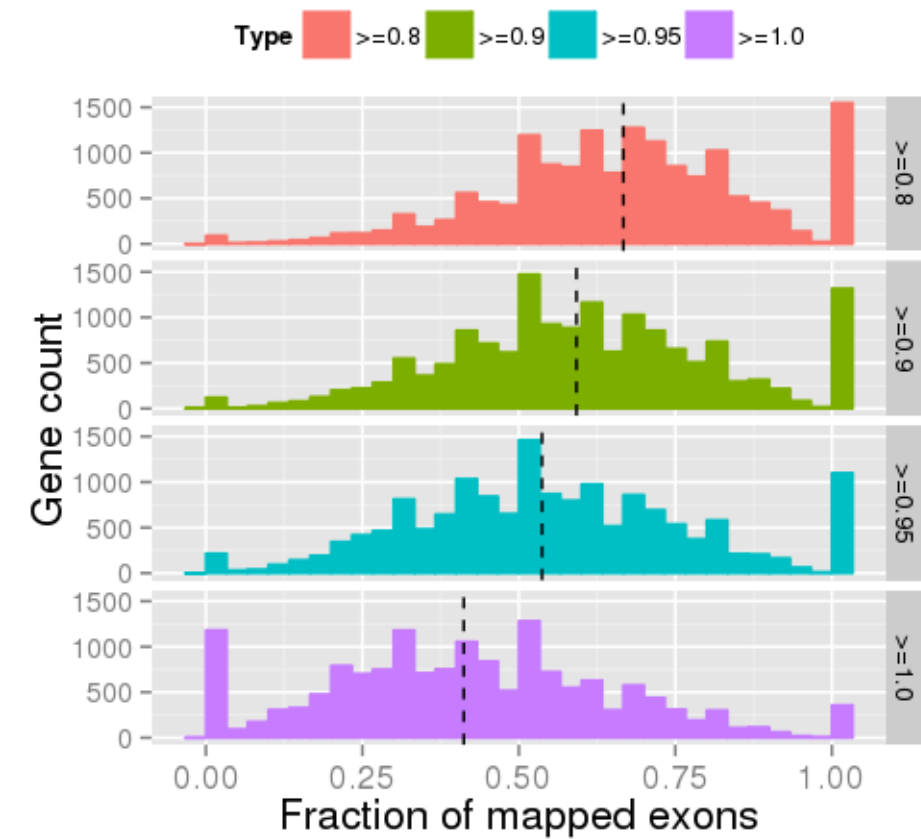**(d)**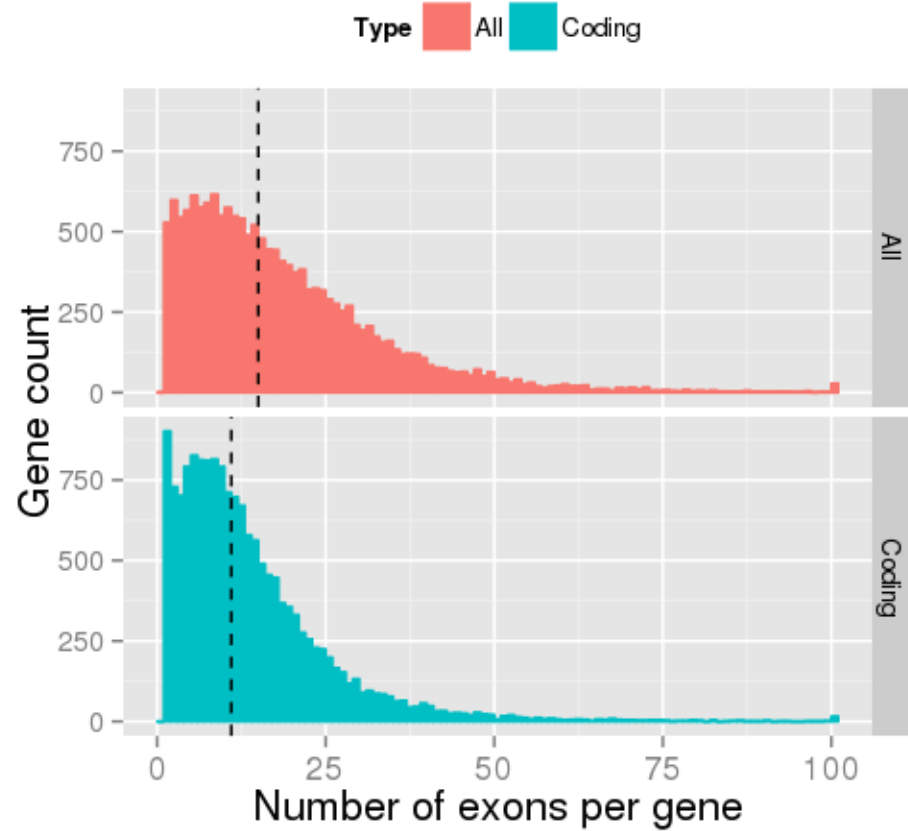**(e)**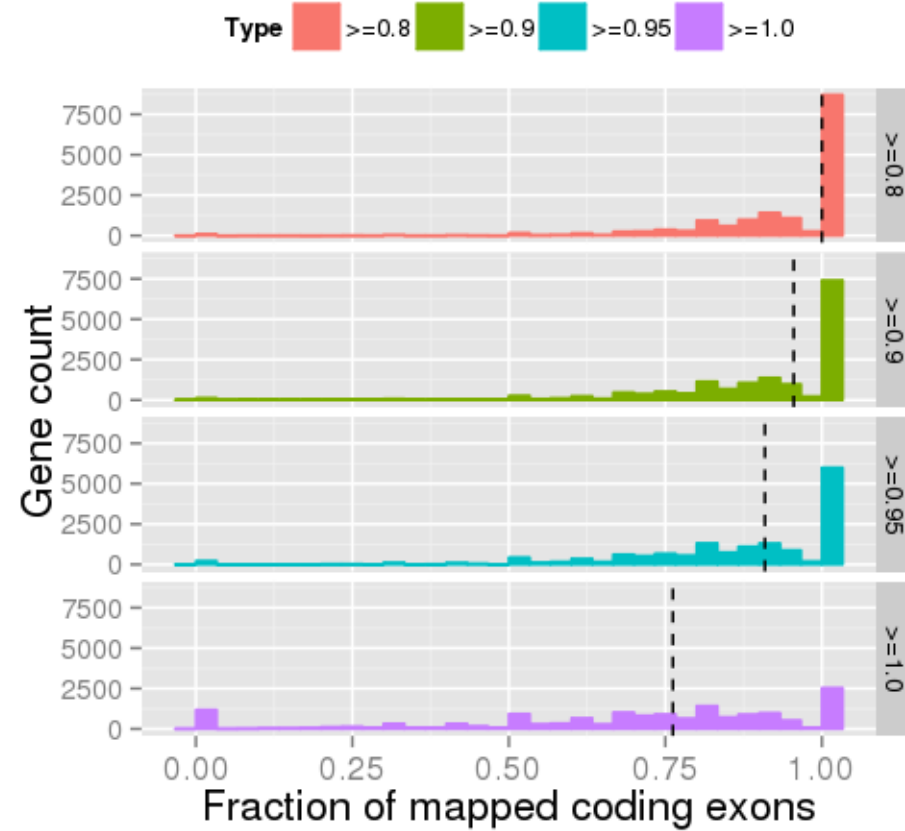**(f)**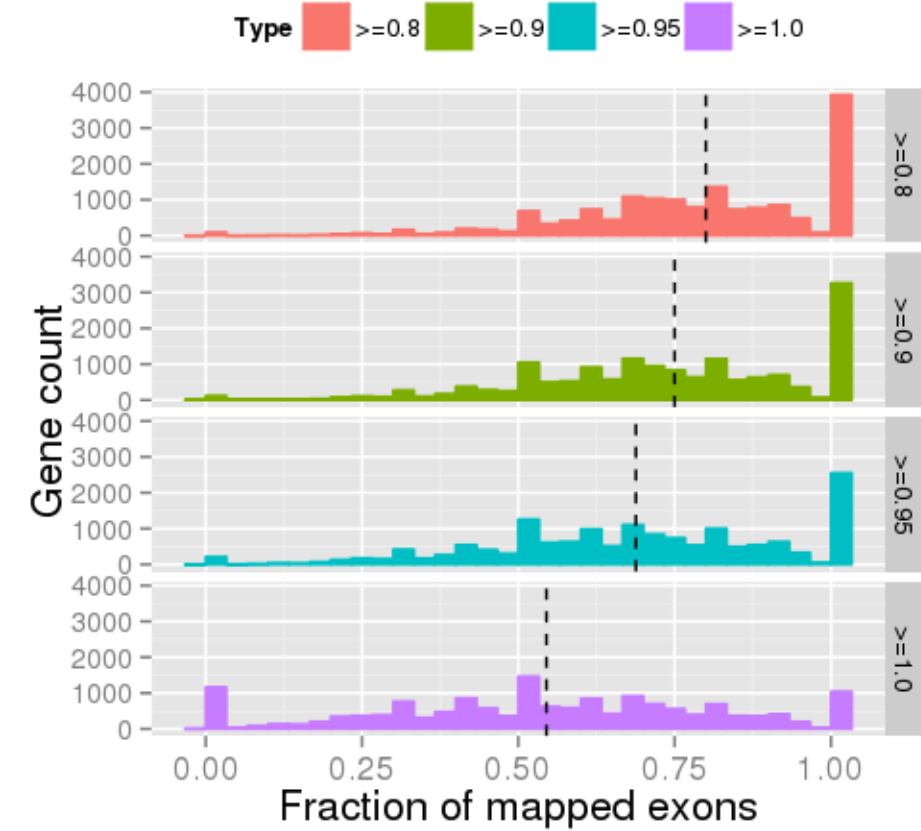

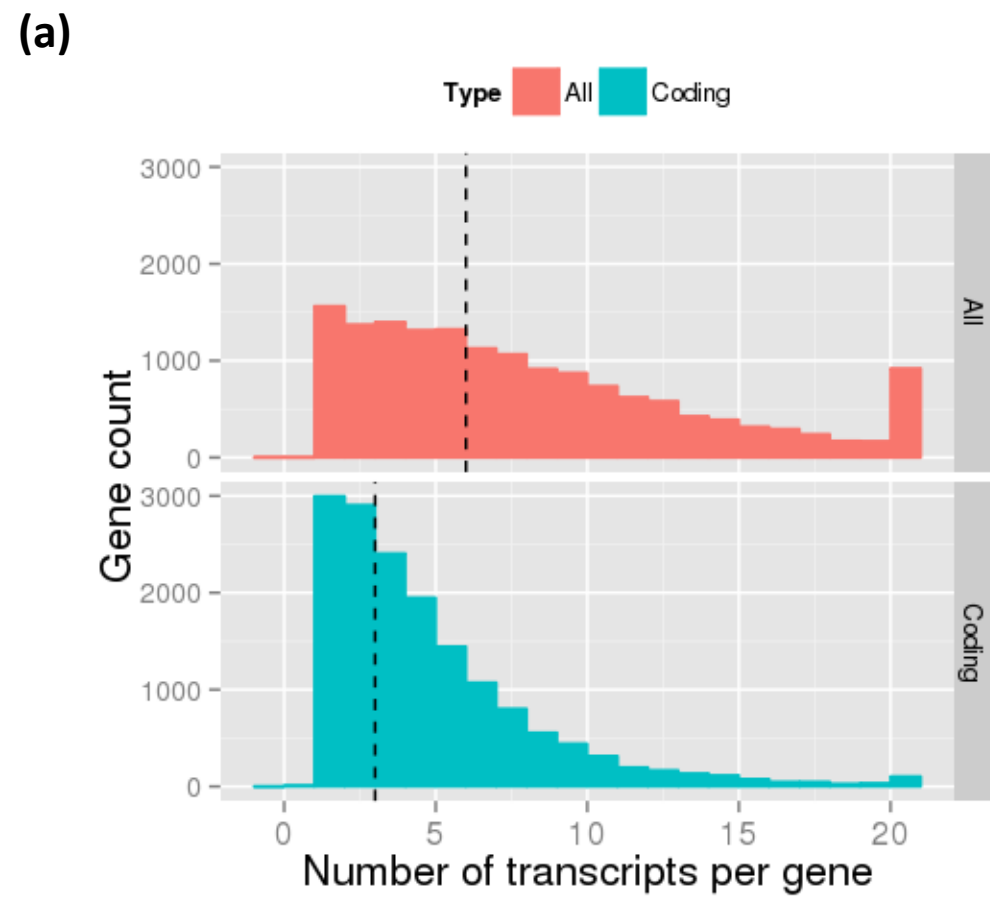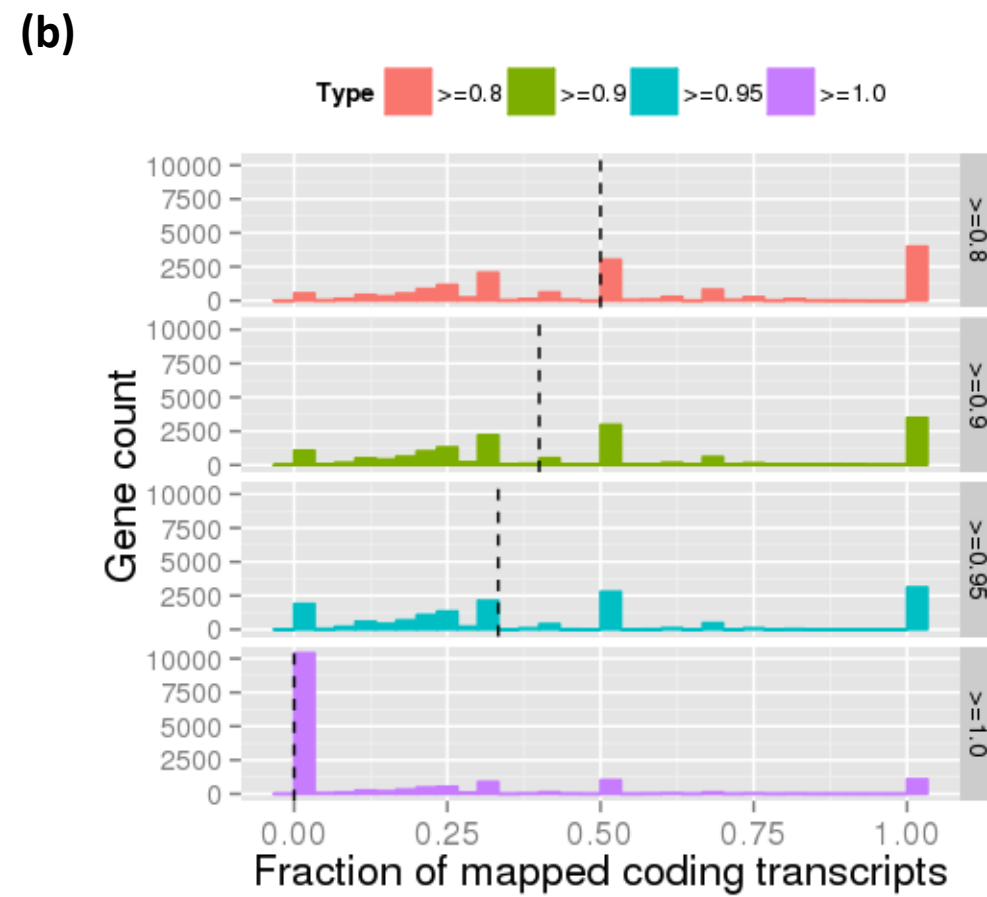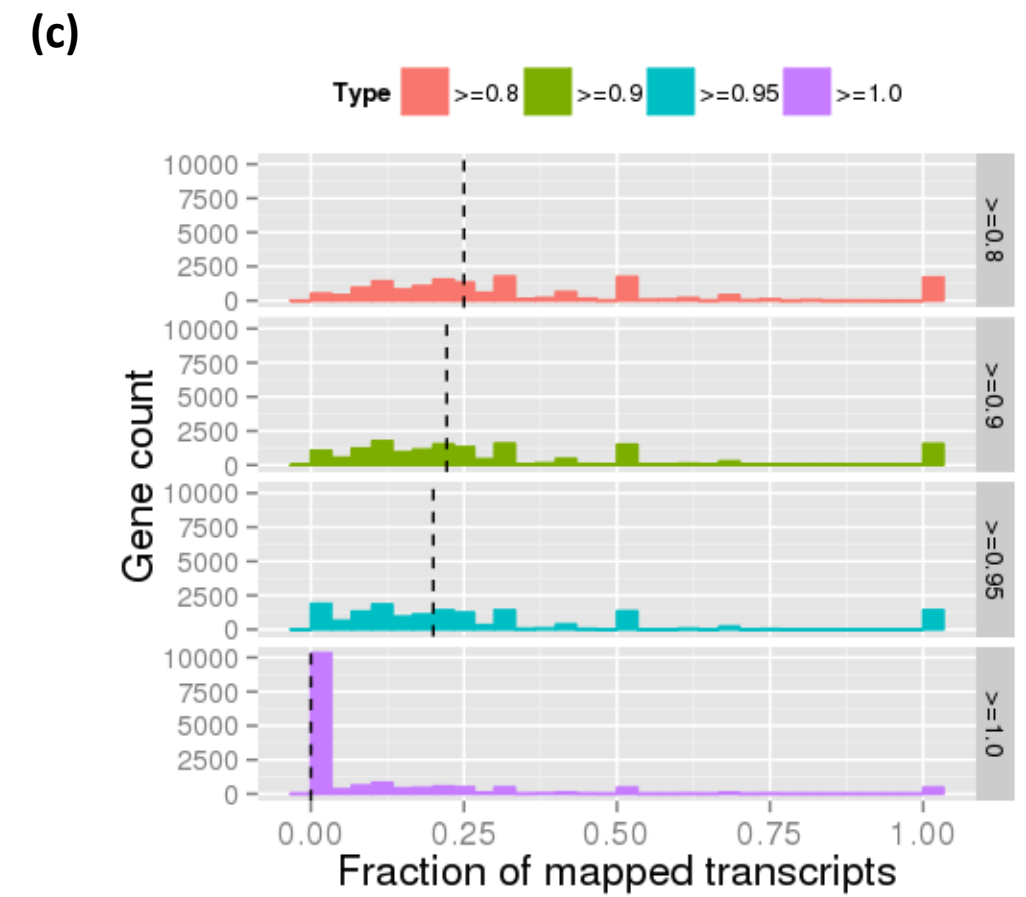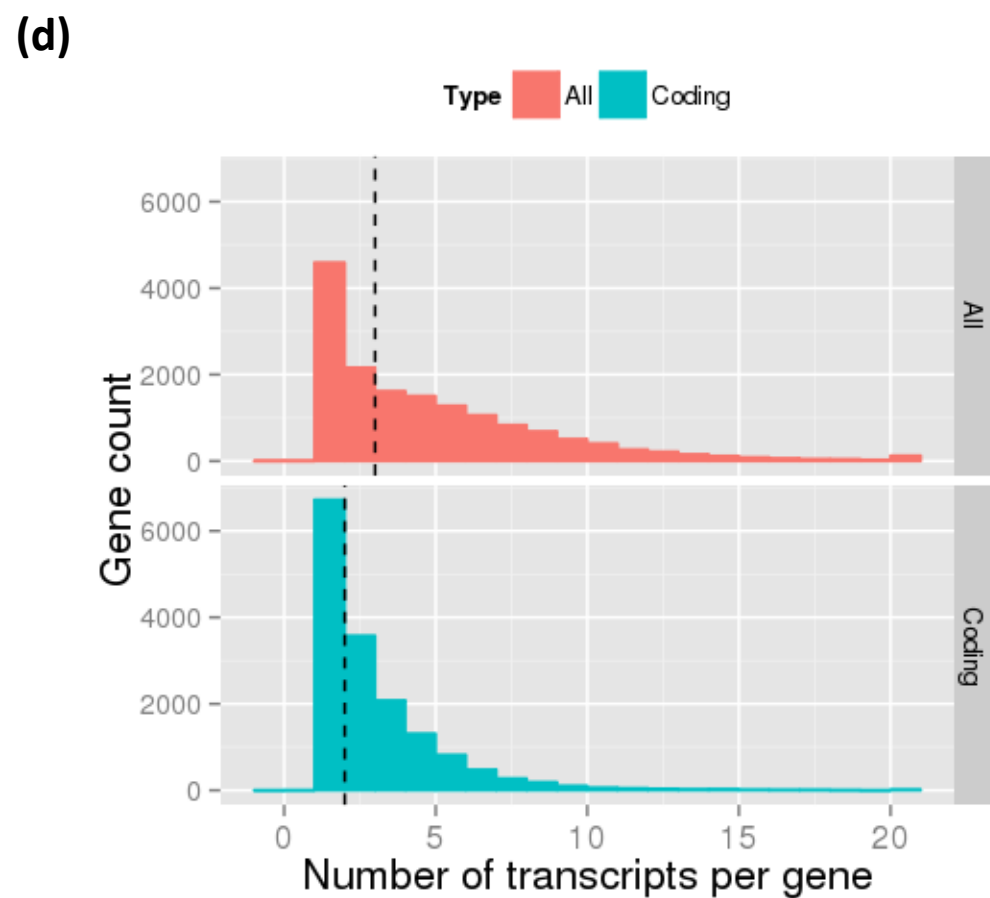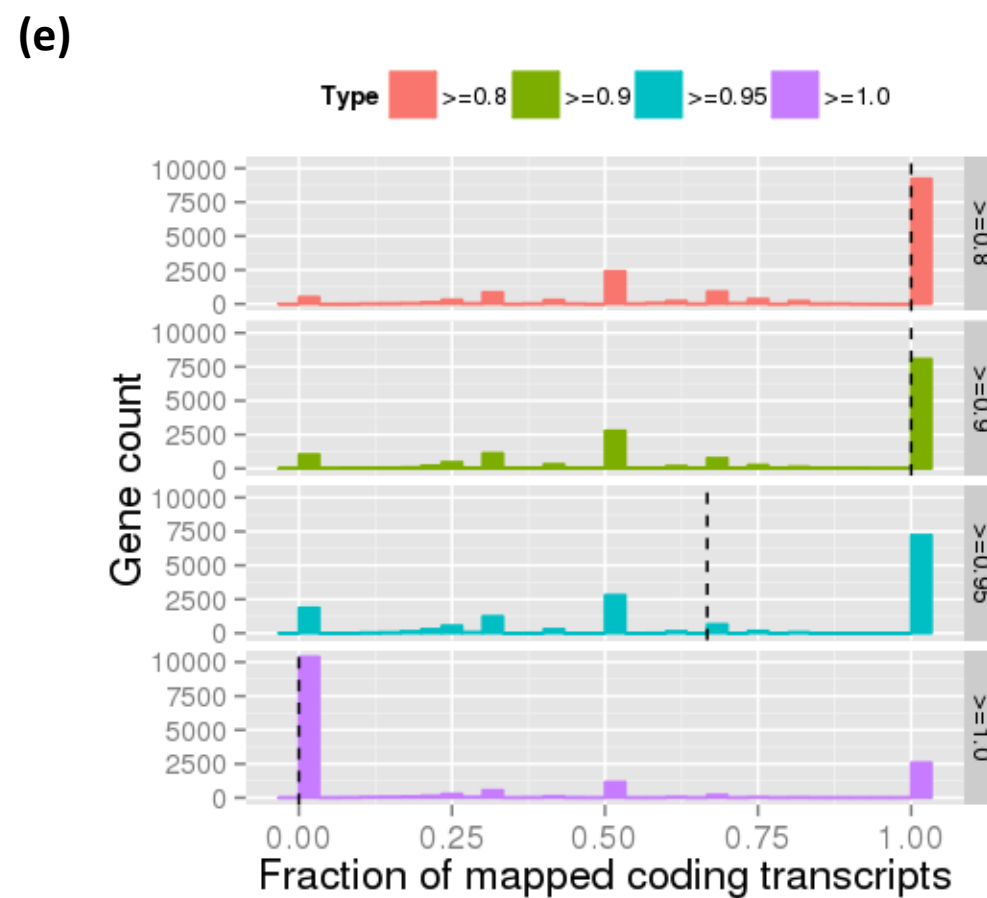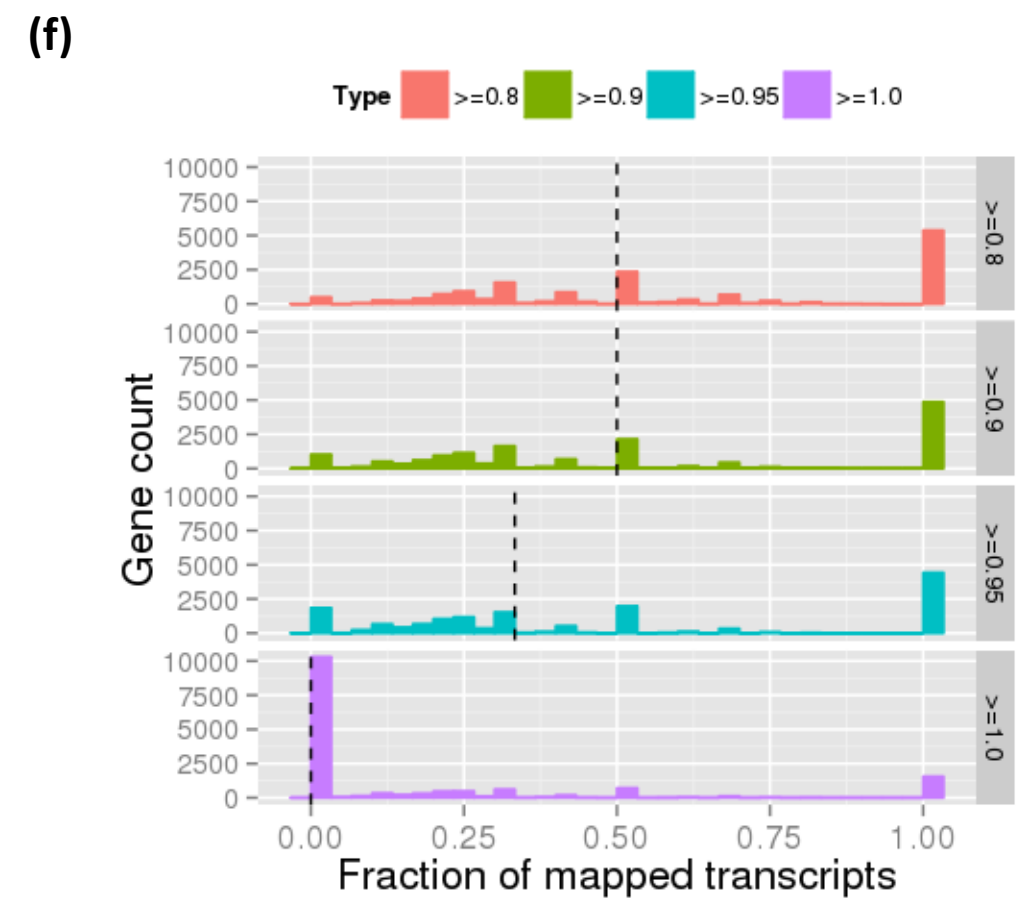



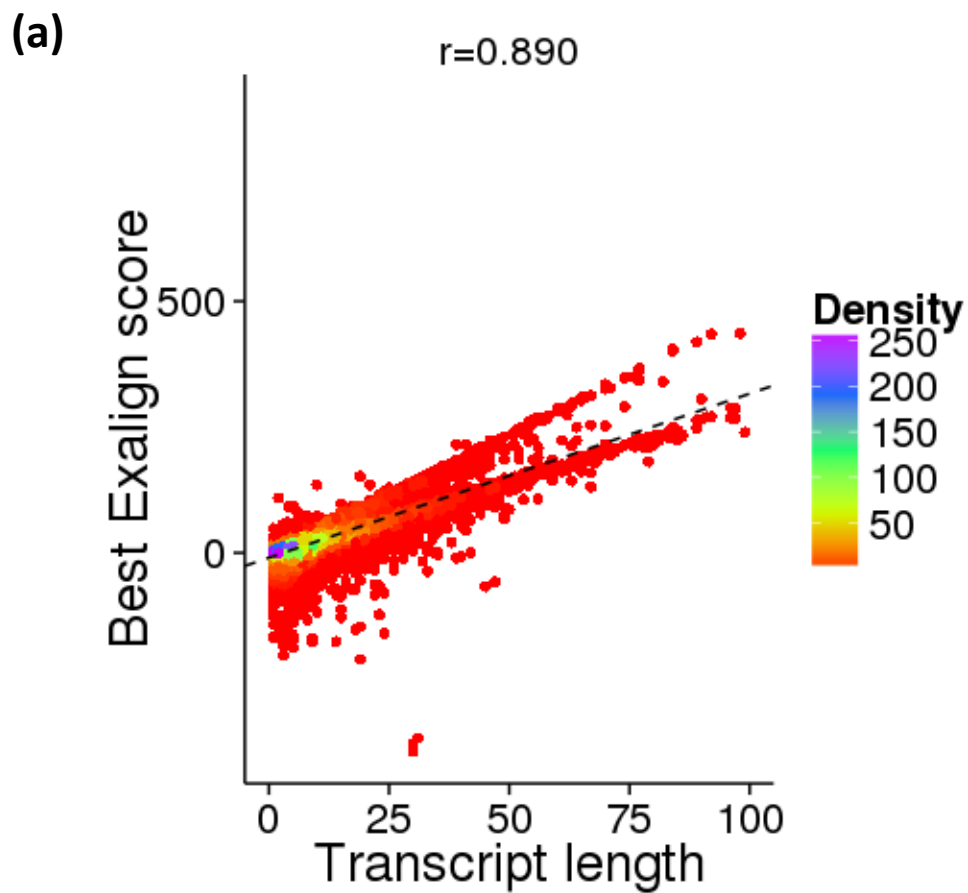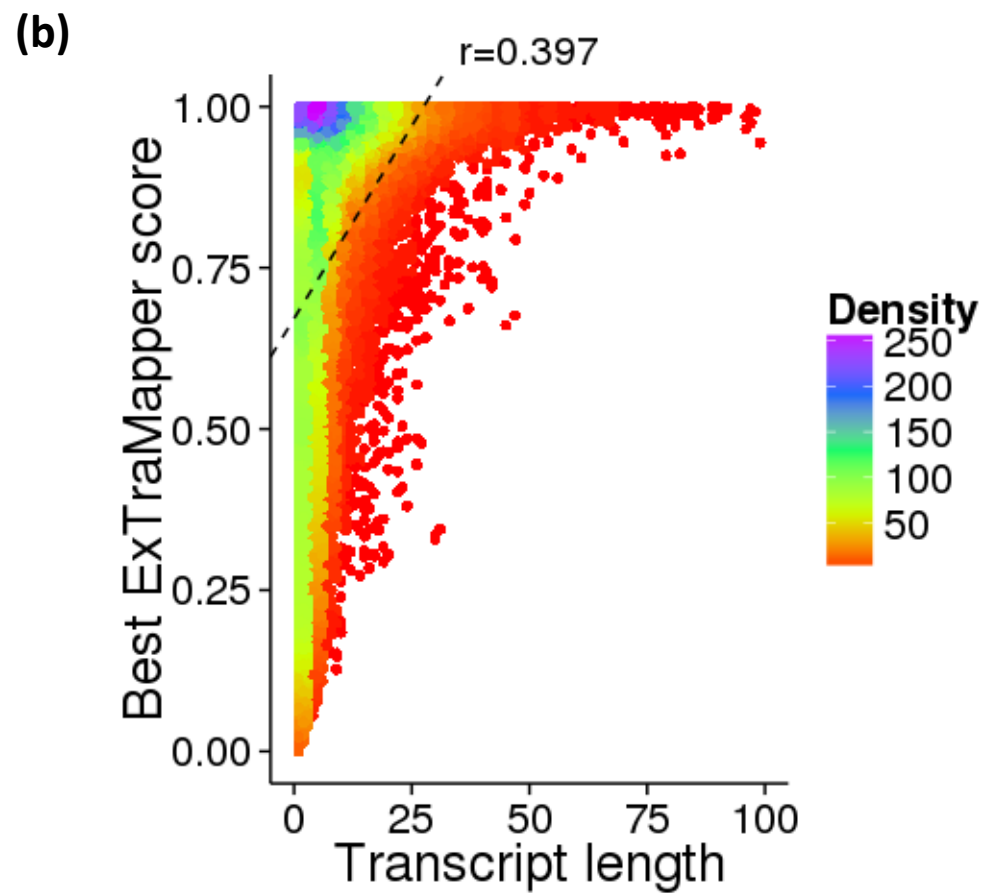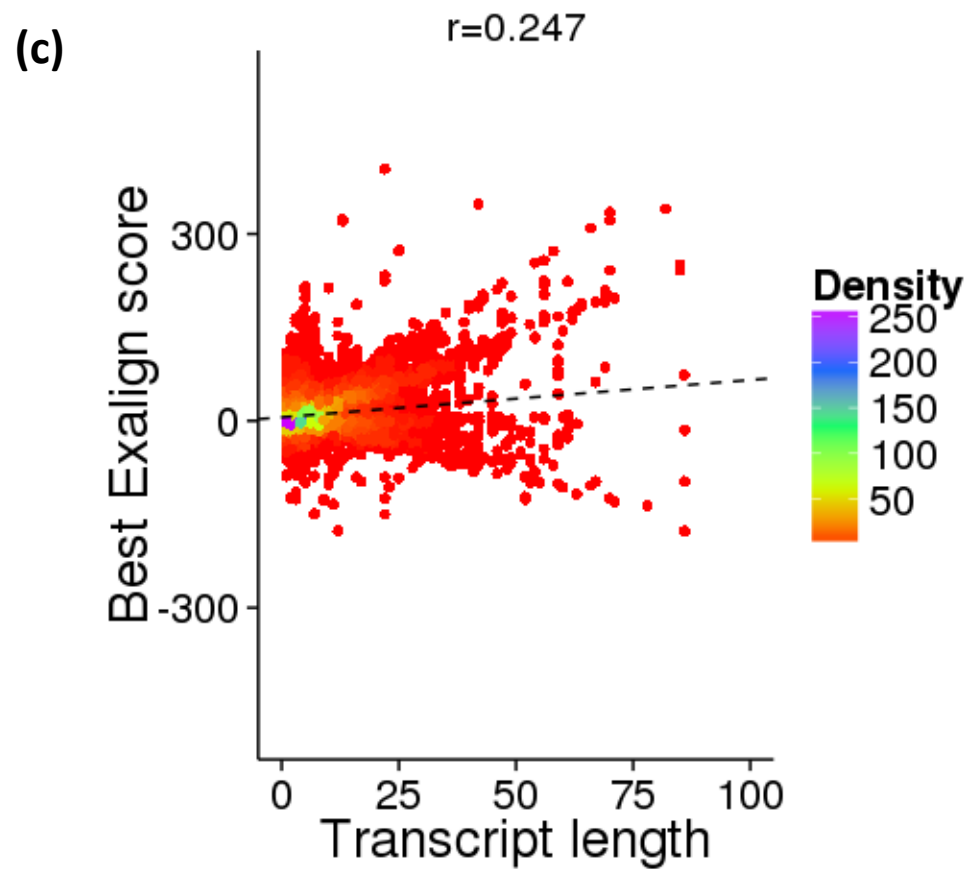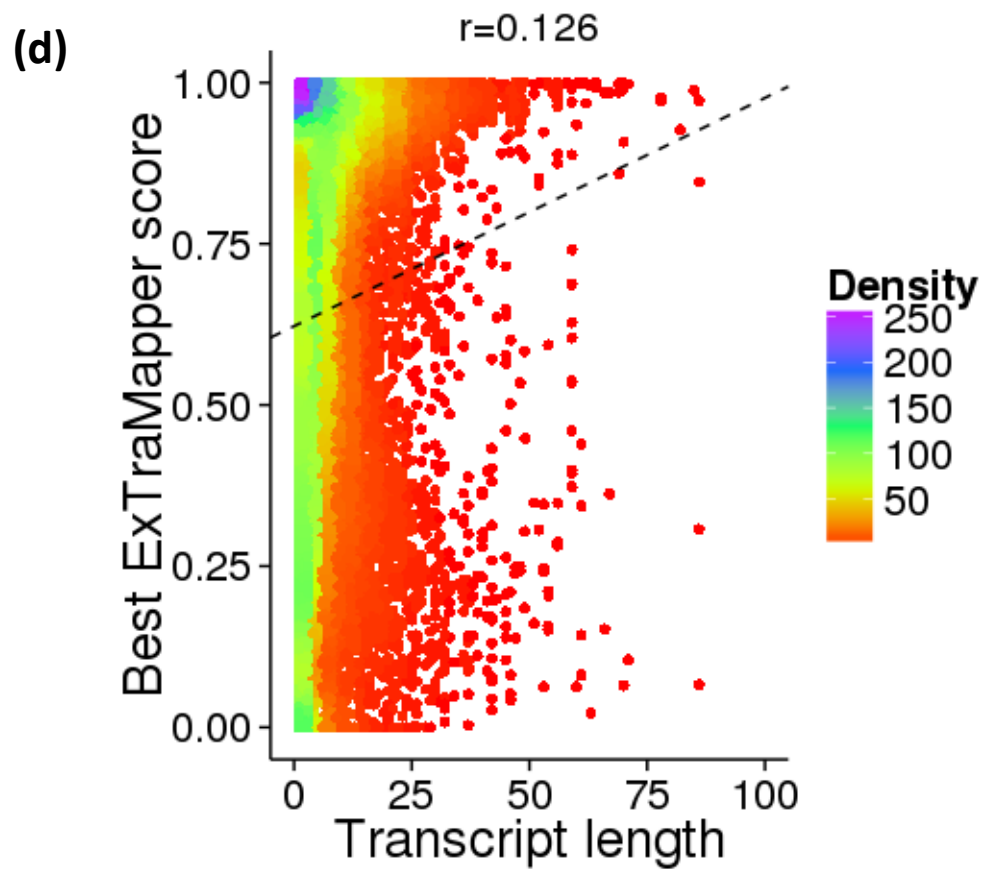

(a)

**BRAF-001**

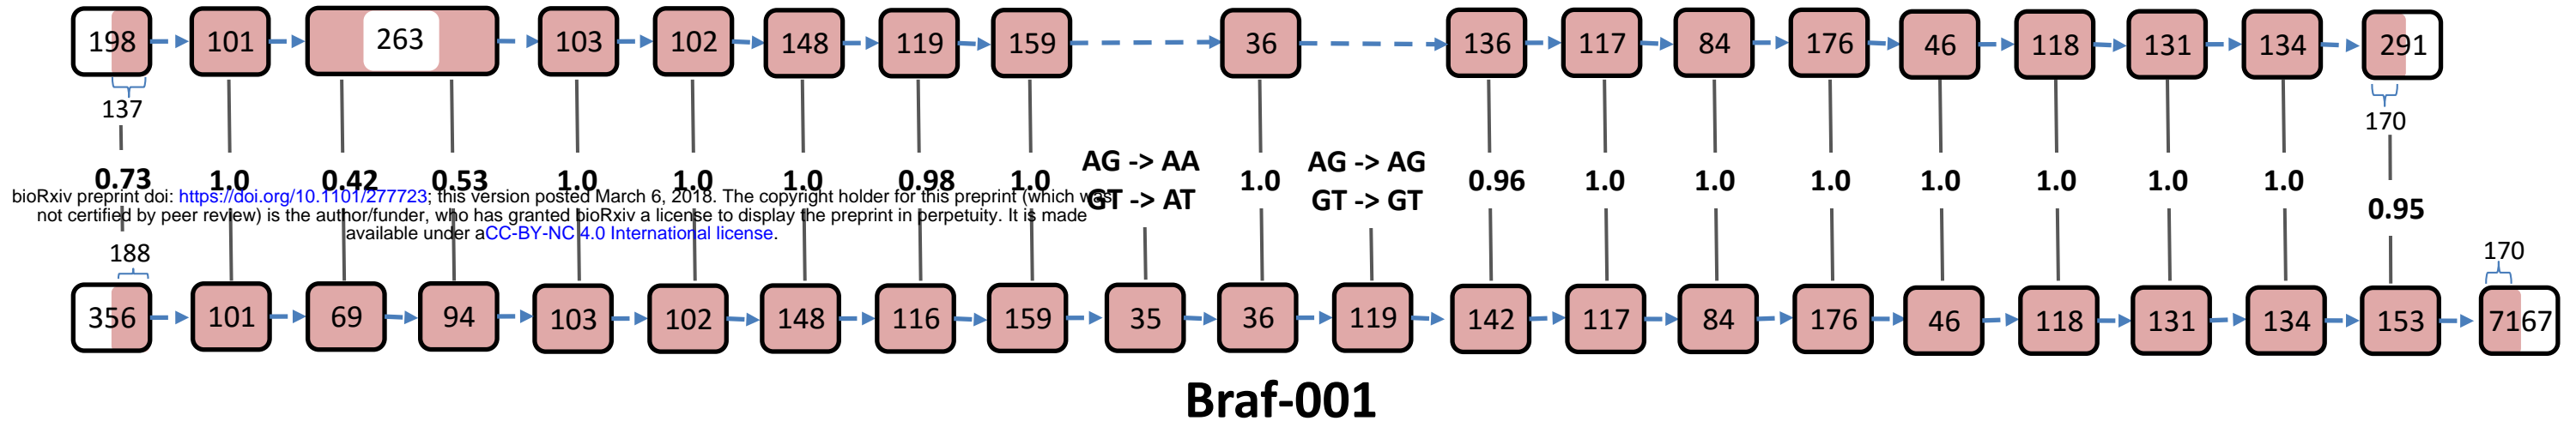

(b)

**BRAF-001**

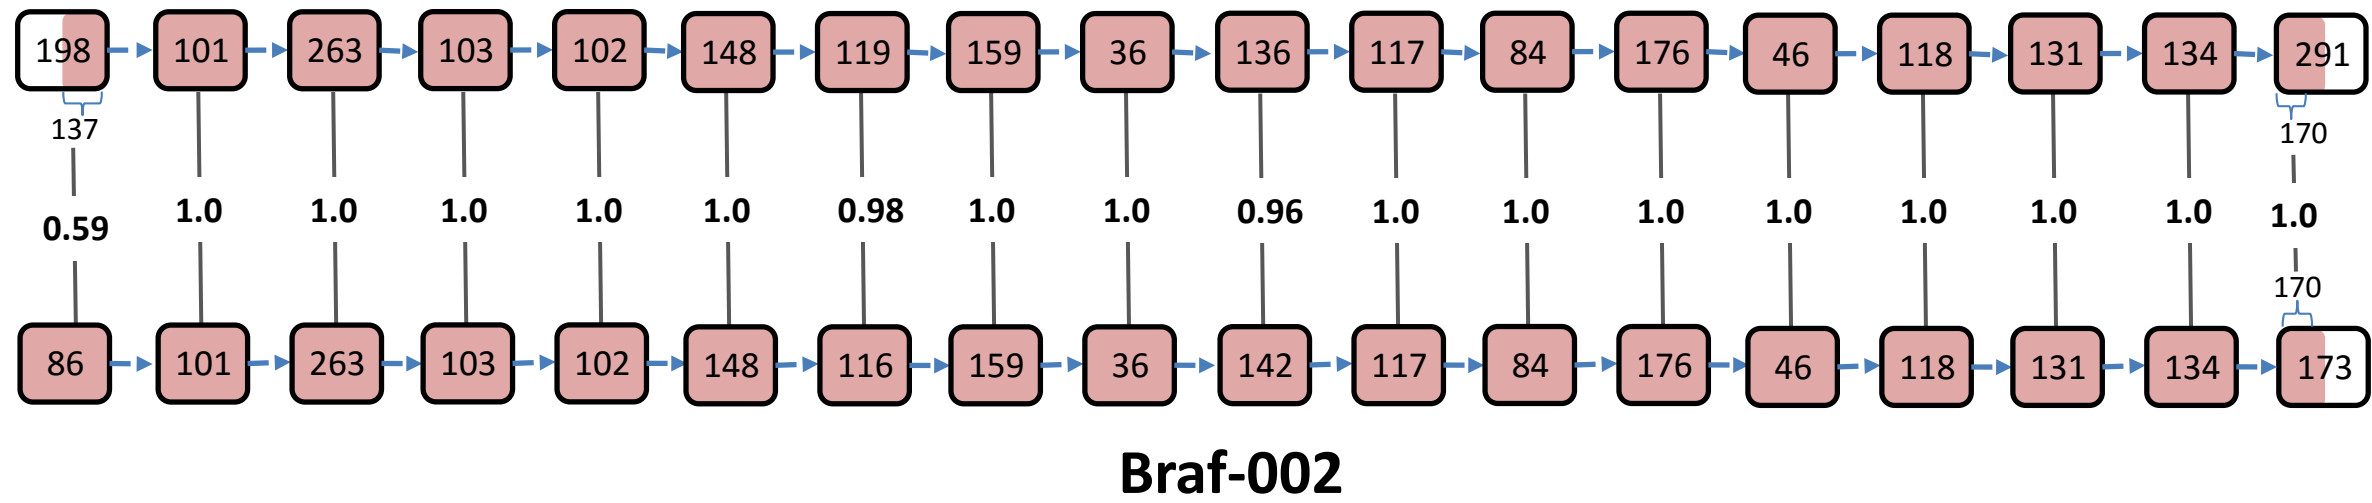

(c)

**BRAF-004**

**BRAF-003**

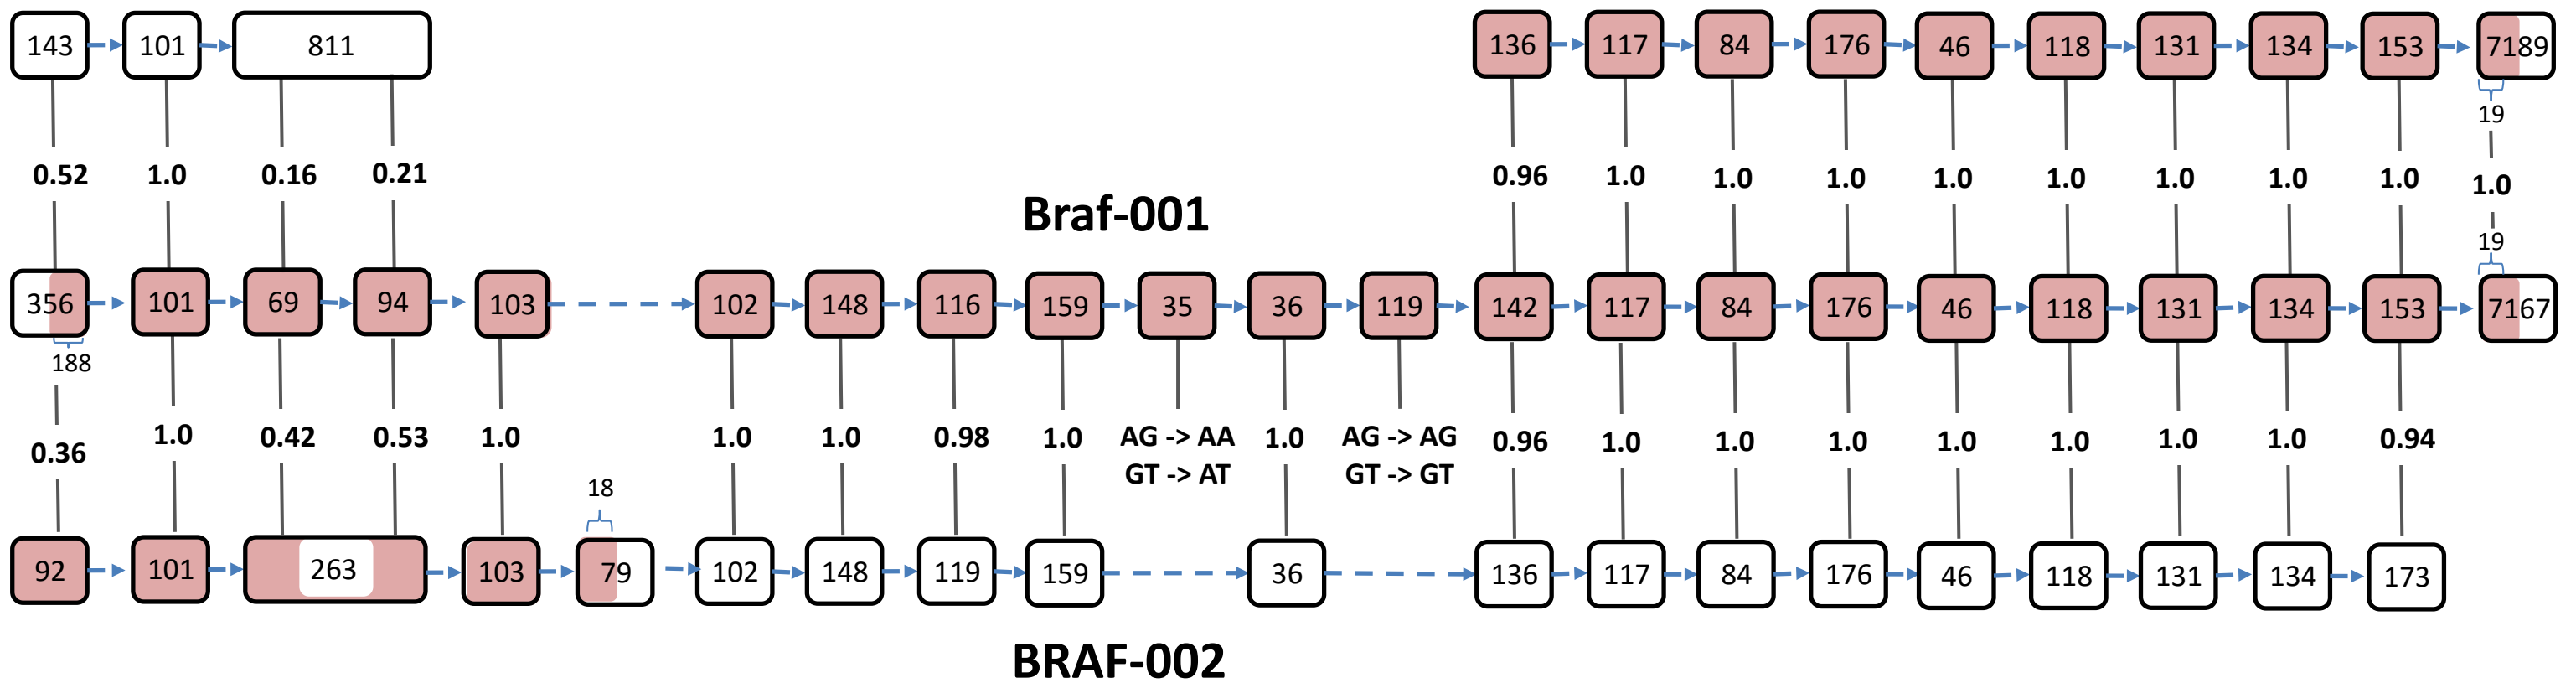

Source: https://www.biorxiv.org/content/10.1101/277723v1.full.pdf
